# Supplementary material for: ACK1 and BRK non-receptor tyrosine kinase deficiencies are associated with familial systemic lupus and involved in efferocytosis
Source: eLife journal article supplement (doi:10.7554/elife.96085), 2024-03-23
Supplement: fig2-data3 [file elife-96085-fig2-data3-v1.zip]

Full unedited gels for Figure 2E. The red boxes show the image used in the manuscript.

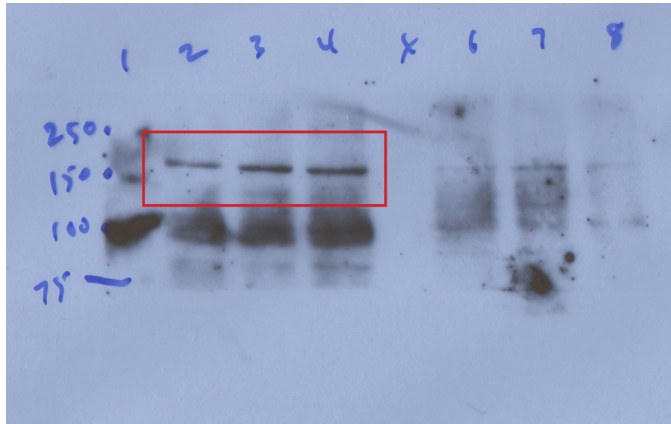

ACK1

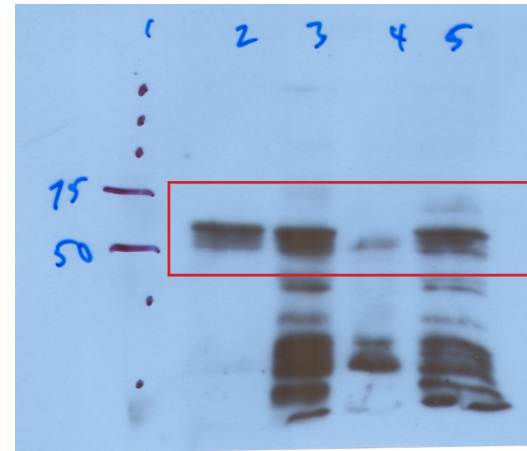

pY342

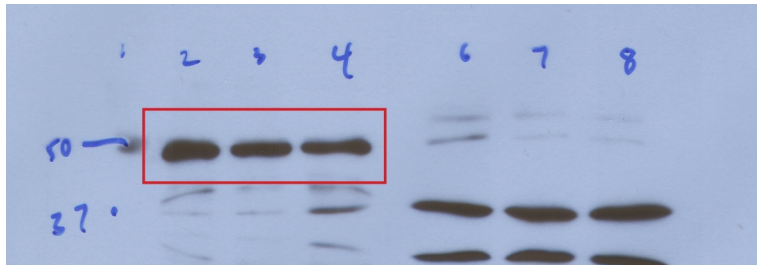

tubulin

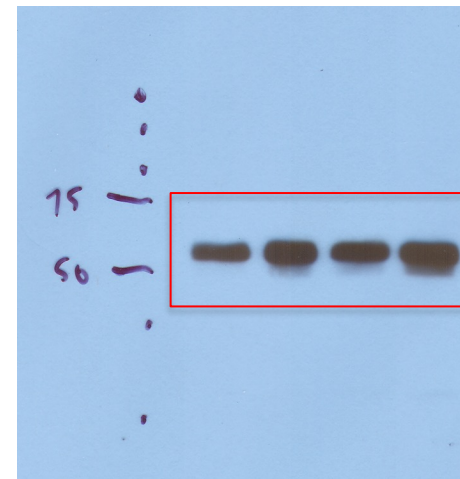

BRK
