# Supplementary material for: ACK1 and BRK non-receptor tyrosine kinase deficiencies are associated with familial systemic lupus and involved in efferocytosis
Source: eLife journal article supplement (doi:10.7554/elife.96085), 2024-03-23

Full unedited gels for Figure 2B (left). The red boxes show the images used in the manuscript.

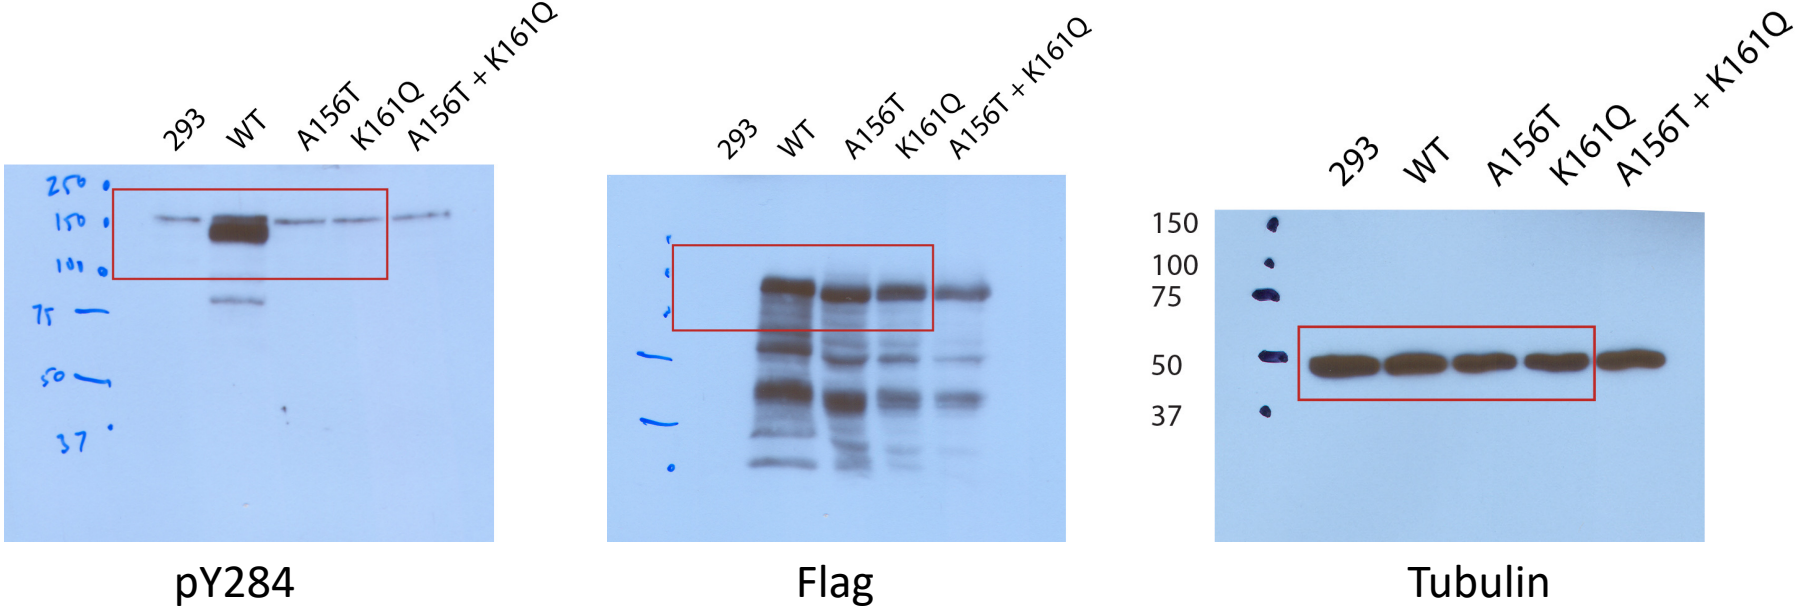

Full unedited gels for Figure 2B (right). The red boxes show the images used in the manuscript.

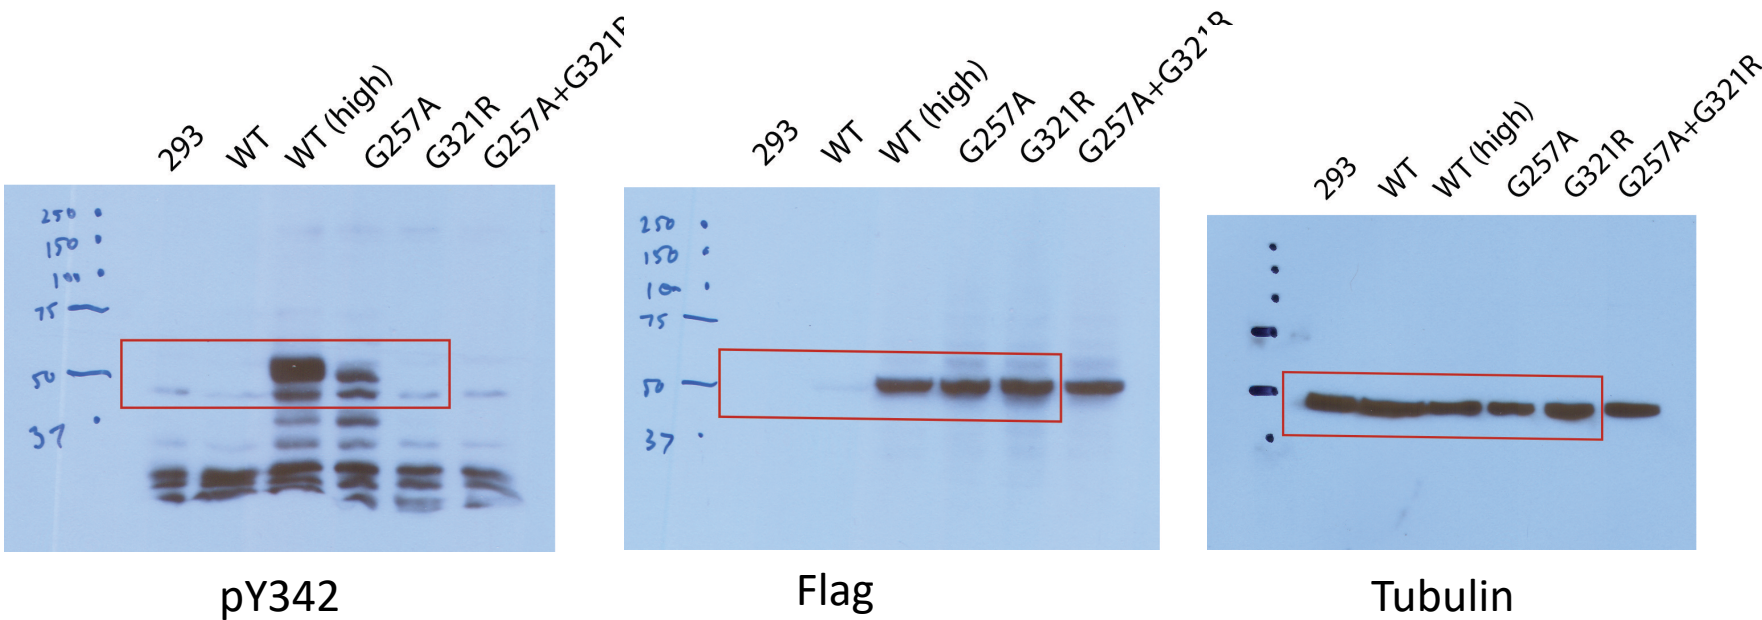

Supplement: fig2-data3 [file elife-96085-fig2-data3-v1.zip]
