# Supplementary material for: ACK1 and BRK non-receptor tyrosine kinase deficiencies are associated with familial systemic lupus and involved in efferocytosis
Source: eLife journal article supplement (doi:10.7554/elife.96085), 2024-03-23
Supplement: fig2-figsupp2-data1 [file elife-96085-fig2-figsupp2-data1-v1.zip]

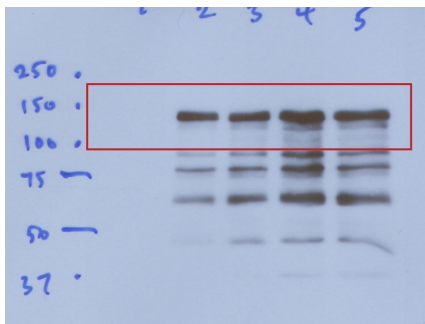

Full unedited gel for Figure 2-figure supplement 2C (Left). The red box shows the image used in the manuscript.

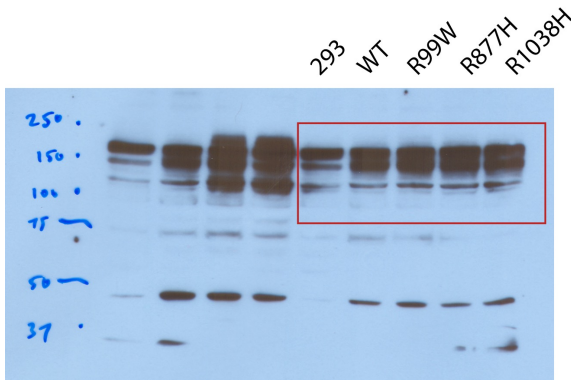

pY284 (dark)

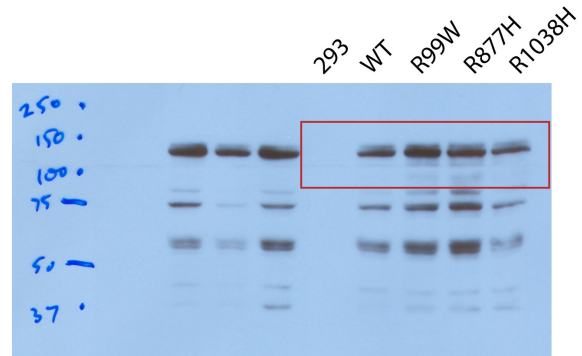

Flag

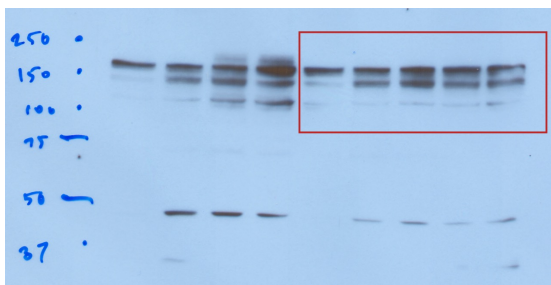

pY284 (light)

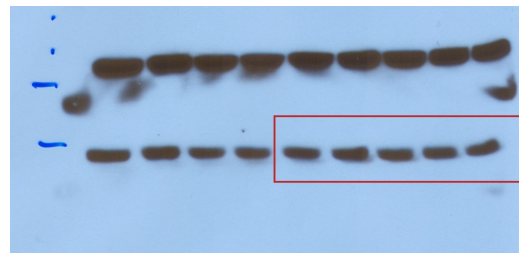

tubulin

Full unedited gel for Figure 2-figure supplement 2C (middle). The red box shows the image used in the manuscript.

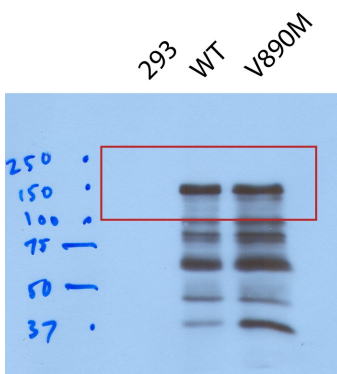

Full unedited gel for Figure 2-figure supplement 2C (right). The red box shows the image used in the manuscript.
