# Supplementary material for: ACK1 and BRK non-receptor tyrosine kinase deficiencies are associated with familial systemic lupus and involved in efferocytosis
Source: eLife journal article supplement (doi:10.7554/elife.96085), 2024-03-23
Supplement: fig4-data6 [file elife-96085-fig4-data6-v1.zip]

Full unedited gels for Figure 4C (left). The red box shows the image used in the manuscript.

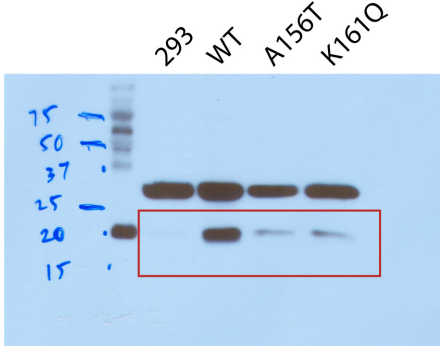

Rac1 (pulldown)

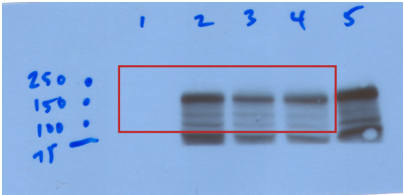

Flag

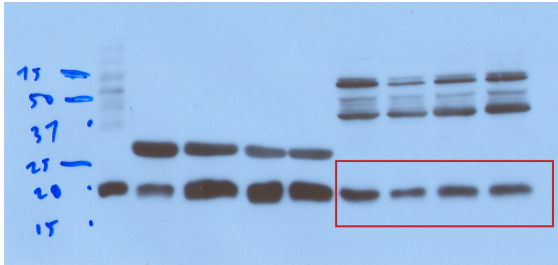

Rac1

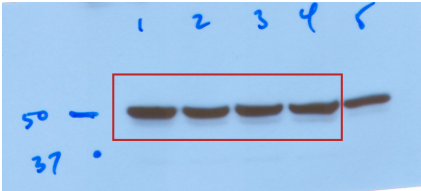

Tubulin

Full unedited gels for Figure 4C (right). The red box shows the image used in the manuscript.

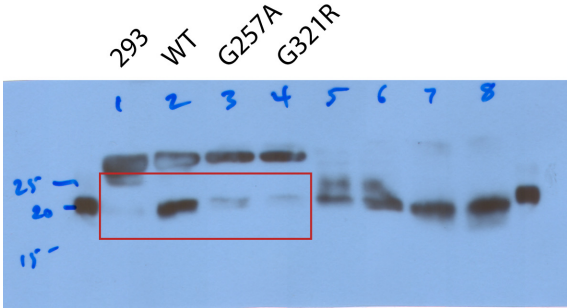

Rac1 (pulldown)

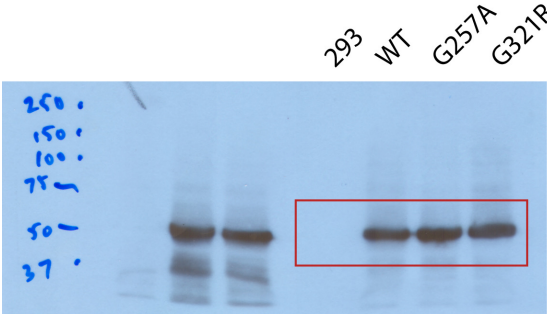

Flag

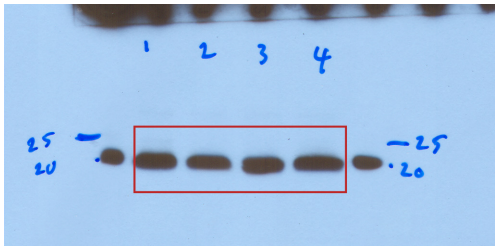

Rac1

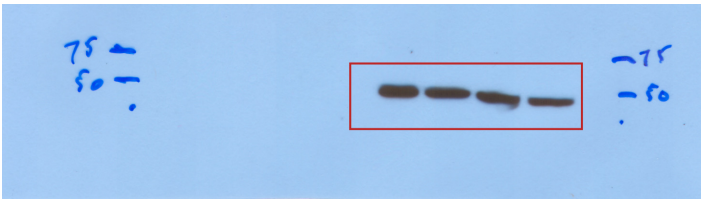

Tubulin
