# Supplementary material for: ACK1 and BRK non-receptor tyrosine kinase deficiencies are associated with familial systemic lupus and involved in efferocytosis
Source: eLife. 2024 Nov 21;13:RP96085. doi: 10.7554/eLife.96085 (PMC11581429; doi:10.7554/eLife.96085)
Supplement: Figure 2—source data 1. [file elife-96085-fig2-data1.xlsx]

## Sheet: Sheet1
Figure 2 - Source Data 1
Figure 2A: Immunoprecipitation (IP) kinase activity assay of WT and mutant ACK1 and BRK kinases in HEK293T cells
Plot values (left panel)					Statistics (left panel): p-values were calculated using an Ordinary one-way ANOVA (Tukey’s multiple comparisons test).
293T	WT	A156T	K161Q		Comparisson	P Value
1.28755	174.506	1.1588	37.382		293T vs. WT	<0.0001
1.41631	164.549	1.93133	27.897		293T vs. A156T	>0.9999
					293T vs. K161Q	0.0104
					WT vs. A156T	<0.0001
					WT vs. K161Q	<0.0001
					A156T vs. K161Q	0.0106
Plot values (right panel)					Statistics (right panel): p-values were calculated using an Ordinary one-way ANOVA (Tukey’s multiple comparisons test).
293T	WT Brk	G257A	G321R		293T vs. WT Brk	0.0023
0	17.2727	4.64015	2.25379		293T vs. G257A	0.1319
0.378788	21.7803	7.51894	0.397727		293T vs. G321R	0.9371
					WT Brk vs. G257A	0.0089
					WT Brk vs. G321R	0.0028
					G257A vs. G321R	0.2253
