# Supplementary material for: ACK1 and BRK non-receptor tyrosine kinase deficiencies are associated with familial systemic lupus and involved in efferocytosis
Source: eLife. 2024 Nov 21;13:RP96085. doi: 10.7554/eLife.96085 (PMC11581429; doi:10.7554/eLife.96085)
Supplement: Figure 2—source data 2. [file elife-96085-fig2-data2.xlsx]

## Sheet: Sheet1
Figure 2 - Source Data 2
Figure 2E: Immunoprecipitation (IP) kinase activity assay in patients’ macrophages
Plot values
BRK WT/G321R	ACK1 WT/K161Q	ACK1 K161Q/K161Q
134.8	49.9	17.1
