# Supplementary material for: ACK1 and BRK non-receptor tyrosine kinase deficiencies are associated with familial systemic lupus and involved in efferocytosis
Source: eLife. 2024 Nov 21;13:RP96085. doi: 10.7554/eLife.96085 (PMC11581429; doi:10.7554/eLife.96085)
Supplement: Figure 3—figure supplement 1—source data 1. [file elife-96085-fig3-figsupp1-data1.xlsx]

## Sheet: Sheet1
Figure 3-figure supplement 1–Source Data 1
Figure 3-figure supplement 1A: Heatmap comparing the levels of select IgG autoantibodies detected in serum of control and inhibitor treated mice
Plot values																Statistics: P-values were calculated using a Wilcoxon matched-pairs signed rank tests
IgG auto-Ab (Ab-Score) Abs=log2(NFI*SNR +1)	DMSO + Pristane M1	DMSO + Pristane M2	DMSO + Pristane M3	DMSO + Pristane M4	DMSO + Pristane M5	CPD4F + Pristane M1	CPD4F + Pristane M2	CPD4F + Pristane M3	CPD4F + Pristane M4	CPD4F + Pristane M5	AIM100 + Pristane M1	AIM100 + Pristane M2	AIM100 + Pristane M3	AIM100 + Pristane M4		Comparisson	P Value
PL-12	10.28	10.16	10.23	11.09	10.83	9.53	11.8	10.58	10.97	9.71	10.3	11.73	11.87	11.09		DMSO + P Group vs Cpd4f + P Group	<0.0155
Peroxiredoxin 1	18.66	18.54	18.22	19.31	18.48	19.51	19.52	18.34	18.87	18.78	19.53	19.04	19.56	18.61		DMSO + P Group vs AIM100 + P Group	0.9121
U1-snRNP-C	12.65	12.41	12.54	13.6	12.99	12.4	13.37	12.66	12.61	12.84	13.28	13.19	14.83	13.05		Cpd4f + P Group vs AIM100 + P Group	<0.0016
GBM dissociated	8.81	8.42	9.03	8.87	8.82	9.03	9.6	9.67	8.14	8.61	9.21	8.48	9.42	9.53
C1q	17.49	17.19	17.62	18.48	17.87	18.39	18.37	17.72	17.69	16.89	18.37	17.82	18.43	18.02
PCNA	12.48	12.95	12.96	13.93	12.8	14.33	14.24	13.01	13.19	12.31	13.86	13.11	15.18	13.02
Fibronectin	15.44	14.99	15.19	15.85	14.52	14.51	15.79	14.89	18.99	20.21	15.22	15.85	15.41	15.78
gP210	0	1.43	6.2	0	0	0	4.22	1.68	3.27	0	0	3.77	4.96	6.81
Sm	12.31	10.53	11.71	12.12	12.42	10.19	11.9	11.6	11.4	11.07	12.25	11.99	14.84	11.79
Hinstone H3	9.18	8.83	9.74	9.39	9.63	8.48	9.87	9.53	8.71	9.79	9.42	9.33	9.65	10.35
Collagen IV	11.27	12.53	11.58	12.51	10.84	11.24	11.84	11.76	12.17	10.22	12.01	12.22	11.75	12.78
Beta 2-glycoprotein	15.71	14.62	15.65	16.15	15.88	15.28	15.5	15.87	15.45	15.56	16.04	15.77	16.01	15.77
LC1	15.4	14.79	14.55	15.43	15.29	14.5	15.6	14.82	15.18	14.38	14.59	15.6	16.14	15.38
Decorin-bovine	3.21	1.7	4.92	3.06	2.89	4.61	4.3	3.87	4.3	2.09	4.4	2.79	3.12	4.99
U1-snRNP-BB'	14.87	16.25	14.49	17.07	16.35	14.13	15.35	15.16	14.28	20.59	14.55	14.88	21.69	17.41
Thyroglobulin	11.87	13.64	12.39	15.12	11.92	14.02	14.58	12.95	14.69	10.61	12.49	14.89	12.71	14.79
Nucleosome antigen	16.79	16.35	17.77	17.49	17.05	17.06	17.23	17.31	16.8	16.45	18.09	17.46	17.8	16.4
TTG	14.07	14.39	13.94	15	14.45	15.9	15.61	14.47	15.35	13.37	15.67	14.95	15.52	13
SmD	12.11	11.06	10.84	11.84	11.78	10.18	11.22	11.14	10.22	10.88	11.42	11.62	14.24	10.64
Histone H2A	18.9	16.39	18.96	17.83	18.73	16.93	17.95	18.5	17.38	18.3	18.31	18.29	18.55	18.69
Mi-2	6.6	7.39	5.06	8.35	6.09	6.16	7.41	6.02	6.64	3.2	4.73	8.88	6.4	8.42
Proteoglycan	6.23	4.37	7.38	7.12	7.15	5.43	6.1	7.64	7.32	4.62	7.66	5.41	5.84	7.99
Vitronectin	13.06	13.4	13.02	14.23	13.18	13.4	13.94	13.46	13.95	11.66	13.89	13.75	13.81	12.52
Gliadin IgG	11.62	15.36	14.05	13.53	12.27	13.76	19.48	13.11	13.63	11.45	15.25	13.07	13.65	12.56
Intrinsic Factor	14.41	14.73	14.12	15.85	18.64	15.41	16.23	14.79	15.8	14.1	16.05	15.77	15.7	15.47
Histone-total	14.41	12.12	14.18	13.1	14.27	12.65	13.07	13.52	12.53	12.96	13.68	13.34	14	13.86
MAG-myelin associated glycoprotein-FC	17.79	17.55	17.77	18.26	17.76	18.11	17.88	17.4	17.76	16.82	18.13	18.04	18.13	17.16
Heparan HSPG	11.96	10.64	12.15	11.85	11.39	11.13	12.04	12.04	11.66	11.83	11.77	11.56	11.32	11.94
Laminin	9.25	8.12	9.15	9.6	9.03	8.91	9.54	9.04	8.09	8.56	9.33	8.95	8.93	9.05
Nup62	6.94	3.88	6.37	4.37	0	1.07	0.17	0	1.17	0	0	5.36	4.19	8.52
Collagen III	6.89	6.26	7.21	6.73	5.85	6.89	6.26	6.51	5.53	6.93	7.85	5.86	5.05	7.85
CENP-A	0	0	2.15	1.38	0	0	6.26	4.57	0.13	0	0	0	0	3.14
SP100	9.15	10.53	10.49	10.54	10.55	9.97	10.25	10.59	11.24	9.51	10.96	11.19	11.21	7.85
Sm/RNP	11.66	11.44	11.37	15.93	14.37	11.5	12.34	11.13	11.37	15.75	12	11.26	17.32	11.64
ssDNA	21.36	19.01	21.48	20.23	20.38	17.87	19.89	19.71	20.74	19.92	20.54	21	20.32	20.23
Aggrecan	6.96	6.6	8.3	9.1	9.91	6.52	7.5	8.93	9.2	6.92	9.91	7.11	6.58	9.17
Histone H1	15.9	18.53	16.24	15.24	16.1	15.57	16.43	16.57	14.08	14.74	16.61	16.46	16.12	16.42
TPO	14.81	14.55	15.62	15.54	15.19	15.9	16.19	14.63	15.28	13.95	16.13	14.19	16.18	14
Collagen VI	4.23	0.18	4.74	5.99	4.92	4.3	5.11	4.12	5.64	4.16	5.69	4.04	0	5.45
U1-snRNP-68	9.06	11.61	8.64	13.07	10.08	8.87	11.24	10.2	9.2	15.26	9.47	9.3	12.12	9.96
Myosin	14.94	14.75	14.78	15.57	14.9	15.73	15.33	15.1	15.2	14.79	15.25	14.88	15.45	13.95
Matrigel	12.74	11.36	12.68	12.44	12.38	10.86	12.29	11.96	11.69	10.78	12.64	12.03	12.07	12.13
Heparan Sulfate	3.11	0	3.59	1.17	2.11	0	0.58	0.89	0	2.93	2.86	0	0	3.49
Collagen V	10.17	10.38	11.12	17.41	10.12	10.16	11.6	11.17	10.88	10.6	11.3	11.01	10.67	11.44
U1-snRNP-A	14.64	22.42	13.28	24.23	23.5	13.02	20.84	11.57	12.37	23.76	19.84	13.15	24.17	12.66
MBP myelin basic protein	17.9	16.76	17.24	17.02	17.3	15.99	17.43	16.86	16.39	16.86	16.93	16.45	17.66	17.15
Collagen I	1.46	0.35	3.07	0.33	0.42	1.03	2.26	3.42	0.79	1.03	2.41	0	0	0
Nucleolin	10.28	10	10.17	10.61	10.21	10.78	11.88	10.33	10.67	10.53	10.38	8.68	10.94	9.48
Cytochrome C	8.51	6.82	8.69	7.57	7.63	6.38	6.93	7.44	6.68	8.21	7.68	7.15	8.06	6.9
Chromatin	12.72	12.31	16.19	13.99	13.61	12.4	13.43	12.98	13.03	13.07	14.31	12.53	12.57	12.52
Cardiolipin	7.02	5.61	8.16	6.08	6.84	4.65	4.2	7.12	5.48	7.28	6.79	4.96	7.28	4.35
Ribo phosphoprotein P0	14.68	13.74	13.15	14.91	15.75	14.03	18.46	19.87	20.21	13.14	14.45	14.03	14.2	9.98
Beta 2-microglobulin	6.61	5.52	8.27	6.16	7.09	5.26	4.63	5.54	4.6	6.78	6.49	5.01	6.51	5.55
Elastin	10.19	9.1	10.26	9.64	9.95	7.99	9.37	9.51	9.12	9.92	9.41	9.72	9.49	8.97
Ribo phosphoprotein P2	10.3	10.06	9.26	11.84	11.51	9.12	18.21	18.95	20.07	7.02	9.78	10.17	8.81	9.85
dsDNA	14.13	14.04	18.43	14.7	13.89	11.95	14.67	13.65	13.76	14.21	14.73	12.97	12.18	12.49
ssRNA	2.83	5.56	2.45	0	5.57	0	0	0	0	0.1	2.37	0.91	0	0
Phosphatidylinositol	4.48	4.36	4.83	5.31	0	0.56	2.05	0	2.74	0	0	3.34	0	1.6
Chondroitin Sulfate	2.91	3.5	3.4	0.41	3.25	0	0.07	0.3	0.07	0	0.48	1.09	0.47	1.56
Vimentin	3.9	3.18	4.86	3.11	2.02	0	0	1.27	0	0	0	0	2.29	1.82
Heparin	2.37	0	2.12	0	1.22	0	0	0	0	0	2	0	0	0
PM/Scl-75	0	0	0	0	0	0	0	0	0	0	0	0	0	0.07
Collagen II	0	0	0	0	0	0	0	0	0	0	0.93	0	0	1.64
Sphingomyelin	0	0	0.08	0	0	0	0	0	0	0	0	0	0	0
DGPS	0	0	2.61	0	0	0	0	0	0	1.5	0	0	0	0
alpha-actinin	0	0	0	0	0	0	0	0	0	0	0	0	0	0
Amyloid	0	0	0	0	0	0	0	0	0	0	0	0	0	0
