# Supplementary material for: ACK1 and BRK non-receptor tyrosine kinase deficiencies are associated with familial systemic lupus and involved in efferocytosis
Source: eLife. 2024 Nov 21;13:RP96085. doi: 10.7554/eLife.96085 (PMC11581429; doi:10.7554/eLife.96085)
Supplement: Figure 3—source data 1. [file elife-96085-fig3-data1.xlsx]

## Sheet: Sheet1
Figure 3 - Source Data 1
Figure 3A: Heatmaps comparing the levels of IgG autoantibodies detected in serum of control and inhibitor treated mice
Plot values (top panel)																Statistics (top panel): P-values were calculated using a Wilcoxon matched-pairs signed rank tests
IgG auto-Ab (Ab-Score) Abs=log2(NFI*SNR +1)	DMSO M1	DMSO M2	DMSO M3	DMSO M4	DMSO M5	CPD4F M1	CPD4F M2	CPD4F M3	CPD4F M4	AIM100 M1	AIM100 M2	AIM100 M3	AIM100 M4	AIM100 M5		Comparisson	P Value
Glycated Albumin	16.6285	15.4958	16.1863	15.6885	15.1624	16.7521	17.2245	17.1342	18.1052	17.0079	16.8613	17.2739	16.774	16.8881		DMSO Group vs Cpd4f Group	<0.0001
Histone H3	7.74364	7.85361	8.50933	7.18279	7.79292	9.03949	8.97845	8.01498	8.36588	8.56272	8.60536	8.54689	8.47874	8.76944		DMSO Group vs AIM100 Group	<0.0001
Cytochrome C	5.60146	5.27348	5.45702	4.93727	5.62497	7.533	6.13669	5.66993	5.76651	7.30956	6.43837	6.84491	7.33575	7.11048		Cpd4f Group vs AIM100 Group	0.4209
SRP54	9.28213	8.93823	8.43808	9.38793	8.32534	9.6848	9.82057	9.45811	8.94579	9.38309	10.1258	9.94417	9.88774	9.92942
Collagen III	7.81416	3.82489	5.12393	3.03269	3.4194	7.54725	7.39007	6.18122	6.66458	7.75924	6.10751	8.0119	6.70932	7.06513
TPO	13.9172	14.1141	13.8269	14.0548	13.4298	14.1718	14.5897	14.0463	14.0468	14.6622	14.945	14.9746	14.6023	14.505
Collagen V	11.4143	7.09776	9.12161	7.76903	8.68951	11.1181	11.5896	9.71243	10.1507	10.4242	10.8896	10.9945	10.8541	10.7734
BPI	12.0891	12.7543	11.973	12.6062	11.8715	11.5117	11.8421	11.9643	12.012	12.8606	13.0941	13.0669	12.9378	12.4068
Topoisomerase I	12.7284	12.1293	12.1373	12.36	11.5507	12.5511	12.9795	13.1372	12.6237	12.738	12.0838	13.0099	12.4537	12.9276
SP100	10.4128	9.50609	8.8463	8.96234	8.55961	10.427	10.5169	9.69571	9.70754	10.6917	9.89596	9.52186	10.6681	9.84315
PM/Scl-100	15.5759	14.8374	13.6027	14.7239	14.5927	15.6492	15.5886	14.9467	15.0406	16.0569	15.4076	16.055	15.4572	15.5293
U1-snRNP-C	12.5949	11.7661	11.3461	11.6254	11.1902	12.081	12.2675	11.9076	12.6366	12.187	12.2849	12.86	12.3511	12.3132
Collagen VI	3.32252	1.44269e-06	1.44269e-06	4.9796	1.44269e-06	6.68453	8.15134	1.84794	4.36425	5.52872	2.74375	3.3962	2.37218	7.4581
Collagen IV	12.1965	9.12653	9.44392	10.2257	9.16423	11.756	11.6502	11.0191	10.921	11.1331	11.5928	11.2775	11.2317	10.8123
M2	11.5713	11.8221	11.2471	12.1855	11.2921	11.7793	15.662	12.4033	11.844	11.9974	12.1738	12.1879	12.1675	12.2356
MAG-myelin associated glycoprotein-FC	16.446	17.0578	16.9349	17.1941	16.548	16.8485	17.1885	17.0783	17.6539	17.5336	17.2238	17.1805	16.9747	17.2098
Vitronectin	13.1286	11.8202	11.7048	12.3787	11.8898	12.4911	12.7967	12.7527	12.6404	12.8658	13.0655	12.7469	13.2444	12.3812
Histone H1	15.2426	13.8027	14.9201	13.9087	14.4997	15.6408	15.6522	14.4815	14.787	15.2425	15.1647	14.7662	15.4403	15.0377
Elastin	8.38258	7.6596	8.72281	7.4555	7.95824	8.77264	8.60528	8.13741	8.78134	8.44372	8.43798	9.10263	8.17586	8.56224
PL-7	14.4114	15.3143	14.4104	15.5267	14.3287	14.9618	15.81	15.1518	15.0524	15.621	15.7266	15.7567	15.6628	15.6659
Scl-70	12.9031	12.6773	12.2424	13.0694	12.0385	12.7447	13.067	13.2232	12.589	13.4776	13.2888	13.5169	12.9413	12.8936
Mitochondrial antigen	11.3329	12.5645	11.1025	11.9873	10.4787	11.9982	11.96	15.1674	12.1261	12.3862	12.2373	12.1847	11.8693	11.8725
Jo-1	13.5323	13.592	13.2517	14.0938	12.8936	13.6586	14.2307	13.9087	13.3139	14.3692	14.3824	14.9262	14.4638	14.5455
CENP-B	13.5004	12.6919	12.4507	13.5649	12.8314	13.5729	13.1531	13.3661	13.2036	13.7025	13.8885	13.5277	13.6471	13.2005
Beta 2-glycoprotein	13.9065	13.7634	13.7926	13.7491	13.6607	14.2489	13.3714	13.9628	14.2884	14.2924	14.6022	14.7752	14.2042	14.6066
Sm/RNP	10.1927	10.0211	9.85897	9.82973	10.0196	10.4735	10.6405	9.84837	9.77865	10.5788	10.911	10.6155	10.6731	10.5722
Intrinsic Factor	14.1563	14.2564	13.575	14.9415	13.7135	14.2494	14.5737	14.6831	14.2691	14.8238	15.9366	15.2571	14.7638	14.1542
Chromatin	12.1669	10.0433	11.3673	11.9087	12.0758	12.2311	12.2209	11.6681	11.8061	12.3106	12.4562	12.5615	12.5808	12.6039
Decorin-bovine	2.50581	0.549372	0.073099	1.70631	0.839297	3.75782	3.6948	1.96282	0.590907	2.96155	3.96918	1.9988	1.58868	1.44269e-06
Prothrombin protein	15.0305	13.8592	13.5223	14.6615	13.8419	14.3529	14.702	15.0036	14.0713	15.2252	14.975	14.8158	15.0109	14.7737
Myosin	13.9096	13.8259	13.0132	13.8566	12.3667	13.1691	14.3241	14.5902	13.2373	14.2036	17.9913	13.8599	14.0221	14.2681
Aggrecan	6.10518	6.15974	5.81518	8.63272	5.87407	9.7481	8.64286	5.82345	6.2568	8.03821	8.3207	6.72058	8.29603	5.98984
Fibrinogen IV	12.8115	13.1091	11.8882	12.78	12.0244	12.4949	13.0327	12.7746	12.5973	13.2439	13.1737	12.9012	12.8923	13.477
Proteoglycan	5.32261	4.54808	4.83886	7.2969	5.06068	8.61683	6.95927	4.88882	5.31649	7.40527	6.91065	5.27237	7.21879	4.66889
U1-snRNP-A	12.0885	11.7371	10.6834	11.5908	10.6434	10.9142	11.4179	10.9983	10.7255	12.0004	13.3975	12.1	11.3078	11.272
LC1	13.8318	14.9966	13.8114	13.8699	12.9492	14.0983	14.3152	13.9673	14.2275	14.2412	14.3201	14.8294	14.2052	14.6931
Collagen I	1.50992	0.338391	1.44269e-06	1.44269e-06	1.44269e-06	2.28164	0.739281	1.44269e-06	0.686479	0.0380474	1.44269e-06	3.47703	0.286401	1.84335
Ro/SSA_52KDa	14.2451	13.5329	13.7392	13.8294	13.4951	13.7483	13.8783	14.1363	13.6521	14.4113	14.4637	16.2591	14.7663	14.1372
TTG	13.546	15.2139	13.1695	14.2196	12.6848	13.5475	13.5216	13.2647	13.4301	14.9635	14.0115	14.9922	14.5145	13.9824
Cardiolipin	5.1186	6.29321	4.54665	4.95799	3.33697	6.59487	6.36988	4.59029	5.21551	6.12574	4.90538	6.24733	3.17434	6.91939
Ribo phosphoprotein P0	12.1418	12.9613	12.2483	12.8765	12.1825	12.3264	12.4422	12.5936	12.9272	13.0505	13.1675	13.2346	12.8944	13.0813
MPO	13.475	12.9545	13.0716	13.452	12.6264	13.1808	13.2545	13.2399	13.1096	13.4558	13.4506	13.8015	13.3271	13.3719
C1q	16.8657	16.4976	16.3993	17.1071	16.3922	16.7174	16.5924	16.4304	16.6581	17.2387	17.2206	17.2894	17.2475	16.8188
Ro/SSA_60KDa	12.0076	11.5502	11.0828	11.9155	10.8804	11.7585	11.5106	11.7763	11.3814	12.4482	11.7181	11.9416	11.815	11.7322
La/SSB	13.5906	13.3405	13.2256	13.8308	12.8318	13.007	13.6718	13.9937	13.2892	13.4469	13.6687	13.8086	13.8602	13.451
Hemocyanin	3.95619	3.15964	3.29419	1.33273	2.63066	5.22436	2.44657	1.5434	3.12028	4.79373	3.41305	5.53338	3.159	4.20518
Peroxiredoxin 1	17.4371	17.9522	17.3672	17.0599	18.1668	17.2394	17.7078	18.0679	17.8339	17.9671	18.3025	17.9437	20.2703	17.3925
GP2	12.7607	12.0293	11.657	13.2521	12.2341	12.7069	12.2463	11.9485	11.9804	13.087	12.8466	12.3948	13.1536	12.5058
KU (P70/P80)	13.0651	13.9697	12.3692	12.9542	12.7203	12.9998	13.312	13.0921	13.0787	13.6381	13.3092	13.2754	13.4316	13.6186
Nucleolin	8.9905	9.60617	9.26388	9.73462	8.7786	10.2124	9.40899	9.0851	8.88954	9.59705	10.3395	16.0159	9.59383	9.5088
Ribo phosphoprotein P1	11.6508	10.6772	9.71841	11.4714	10.2108	11.1347	11.3064	11.4201	10.8139	11.2343	11.2373	10.8202	11.2675	10.3886
Nucleosome antigen	15.6847	15.9704	15.6235	16.3013	15.2581	15.9128	15.7694	15.8001	15.6904	16.4879	16.1968	17.5605	16.2144	16.4666
Fibrinogen S	13.1581	13.8543	13.1773	13.5996	12.7629	13.5275	13.3124	13.2904	13.0208	14.0733	13.9121	14.0894	13.6029	14.2408
Beta 2-microglobulin	4.48246	4.09104	5.33331	3.7056	4.48669	6.2885	5.26692	5.30049	5.81261	5.46065	4.10813	5.21381	2.69756	4.85423
Histone-total	11.9878	12.3727	13.0253	10.7958	12.1596	13.1735	12.9138	11.6019	11.4175	12.3405	12.7199	12.8577	11.8844	13.1151
Ribo phosphoprotein P2	8.91255	8.27685	7.54302	8.58949	7.40647	7.86728	8.8779	9.16952	8.4084	8.3266	8.49917	8.2455	8.39342	7.94904
ssDNA	16.8241	18.4972	18.3579	16.6863	18.2066	17.9379	17.9986	18.9867	16.6963	16.9765	17.8629	18.4393	19.323	19.3251
Histone H2B	15.7931	14.0065	15.44	15.1893	15.2665	15.5843	15.0711	15.0065	15.1523	15.701	15.6472	15.1694	15.4971	15.6761
U1-snRNP-BB'	13.9619	14.6287	13.277	14.7514	12.9718	13.6547	13.8764	12.7997	20.4261	13.7712	13.677	14.1985	13.6788	13.8506
Fibronectin	13.5592	14.668	12.6424	13.8448	12.3938	13.2387	13.3069	13.8185	14.337	13.5275	14.3507	13.0556	13.9328	13.3274
PL-12	9.79652	9.66422	9.03511	10.0554	8.83047	9.30706	9.79457	9.69054	9.31683	10.4074	10.0138	9.24345	9.29659	9.66082
Thyroglobulin	13.725	13.6404	11.0072	13.8597	11.647	12.7112	12.5461	13.4928	13.956	11.9474	14.5161	11.9814	14.3934	11.3945
Matrigel	11.0266	9.75884	14.5462	10.633	10.9515	11.2475	12.1126	10.7116	11.1594	11.3349	11.1844	11.6291	11.0162	11.1205
Gliadin IgG	11.416	11.202	11.1607	13.121	21.1745	11.6102	12.5642	11.7176	18.5699	11.4821	11.6581	11.9291	11.3361	17.8603
Chondroitin Sulfate	1.85559	2.22404	0.626906	2.70614	0.725959	2.3594	0.931614	0.687061	3.40599	0.510384	1.44269e-06	4.14548	1.76547	0.421512
Heparan HSPG	10.4501	9.8147	15.157	10.3007	10.9812	11.3036	12.1925	10.3656	10.4632	10.8859	10.7699	10.9352	11.0259	10.1759
dsDNA	11.6123	10.2107	11.5704	11.5044	12.2063	10.6405	11.6677	11.9169	10.7829	9.99924	10.0157	12.2067	12.4379	10.8639
PR3	9.86909	9.45919	8.16854	9.81526	8.67104	7.78486	8.75879	9.2296	9.19163	8.93917	9.5113	8.95979	9.74304	8.92007
Entaktin EDTA	8.03919	8.68377	8.47018	9.00614	8.21555	8.98495	8.69128	7.68679	7.97014	7.8234	8.95352	8.67012	9.13271	8.50421
Laminin	7.07989	7.82304	12.9546	8.28521	9.55675	8.30116	10.0378	7.63302	12.0298	8.46556	8.29632	8.63892	8.3245	8.25505
GBM dissociated	8.07771	7.28858	7.15789	6.65274	9.58261	8.16855	7.70834	7.65849	6.99527	7.26149	7.62082	7.14295	7.22937	6.69026
Histone H4	6.09635	7.16462	7.01328	6.9571	7.19805	7.35223	7.20878	6.38306	5.32166	6.43734	7.30626	7.14825	6.68546	7.50303
MBP myelin basic protein	15.8381	17.0626	16.542	16.6269	16.3963	16.0657	16.1315	15.858	16.0941	16.4068	16.7182	16.6245	15.8244	16.9116
PCNA	12.5154	12.8255	12.7159	13.1456	12.287	11.6399	11.9838	12.5537	12.3212	12.0748	13.3819	12.4766	13.6971	11.9477
Heparan Sulfate	1.44269e-06	1.44269e-06	2.4492	1.44269e-06	1.31101	3.83314	0.164033	1.99956	0.479017	1.44269e-06	1.44269e-06	1.96575	1.44269e-06	1.44269e-06
Mi-2	6.95971	6.7525	3.69142	6.50698	5.5603	3.87111	6.14775	7.06009	6.96361	1.44269e-06	3.04472	1.44269e-06	3.06598	1.44269e-06
Histone H2A	16.6258	16.6224	17.2398	17.1673	17.7906	17.5229	16.7484	16.5064	16.5182	16.8403	17.2345	16.717	16.6087	17.0729
LKM1	7.4339	7.62834	7.05535	6.85134	6.9082	6.40998	6.53412	7.76336	7.23306	7.50386	5.88617	6.05359	7.27898	4.36211
U1-snRNP-68	8.46767	8.68962	7.23918	8.3721	7.3281	7.87637	8.338	8.40924	8.89628	7.4781	7.88616	7.80009	7.72077	6.75926
Phosphatidylinositol	2.60688	4.62853	2.319	1.38011	0.634193	0.738047	0.643804	3.95506	1.48305	1.44269e-06	1.44269e-06	1.44269e-06	1.44269e-06	1.44269e-06
Sm	10.0179	10.9133	10.5022	10.7552	10.1941	10.3346	10.1628	9.94021	10.4051	10.726	10.4937	11.308	10.2012	11.0382
Nup62	1.83637	1.72764	0.0955869	1.68699	1.44269e-06	1.44269e-06	1.05477	3.82397	4.79294	1.44269e-06	1.44269e-06	1.44269e-06	1.44269e-06	1.44269e-06
Vimentin	3.31009	0.680887	4.2036	2.93216	3.51469	3.40783	1.44269e-06	2.27042	0.773996	1.44269e-06	1.44269e-06	1.44269e-06	1.44269e-06	1.44269e-06
SmD	10.4014	11.1471	10.4338	11.626	10.4192	9.76167	10.2635	9.8271	10.5	9.85694	10.5338	10.2739	10.1973	10.2438
ssRNA	1.44269e-06	1.44269e-06	0.0734059	1.52647	1.44269e-06	1.76053	5.02414	1.44269e-06	1.44269e-06	1.44269e-06	1.44269e-06	2.39222	1.44269e-06	0.234151
CENP-A	0.209414	0.0731169	1.44269e-06	0.483577	2.35325	2.41663	1.44269e-06	0.0267735	1.44269e-06	1.44269e-06	1.44269e-06	1.44269e-06	1.44269e-06	1.44269e-06
DGPS	1.44269e-06	1.44269e-06	0.197819	1.44269e-06	0.0235868	2.24965	1.44269e-06	1.44269e-06	1.44269e-06	1.44269e-06	1.44269e-06	0.18899	1.44269e-06	1.44269e-06
gP210	3.45056	1.44269e-06	1.44269e-06	1.44269e-06	1.44269e-06	1.44269e-06	0.0982531	2.37454	0.0710415	1.44269e-06	1.44269e-06	1.44269e-06	1.44269e-06	1.44269e-06
Heparin	1.44269e-06	1.44269e-06	1.44269e-06	1.44269e-06	0.142706	1.65546	1.44269e-06	1.44269e-06	1.44269e-06	1.44269e-06	1.44269e-06	0.0359402	1.44269e-06	1.44269e-06
Collagen II	1.44269e-06	1.44269e-06	1.44269e-06	1.44269e-06	1.44269e-06	1.98958	1.44269e-06	1.44269e-06	1.44269e-06	1.44269e-06	1.44269e-06	1.44269e-06	1.44269e-06	1.44269e-06
Sphingomyelin	1.44269e-06	1.44269e-06	1.44269e-06	1.44269e-06	1.44269e-06	1.44269e-06	1.44269e-06	0.580353	1.44269e-06	1.44269e-06	1.44269e-06	1.44269e-06	1.44269e-06	1.44269e-06
Amyloid	1.44269e-06	1.44269e-06	1.44269e-06	1.44269e-06	1.44269e-06	0.0894548	1.44269e-06	1.44269e-06	1.44269e-06	1.44269e-06	1.44269e-06	1.44269e-06	1.44269e-06	1.44269e-06
alpha-actinin	1.44269e-06	1.44269e-06	1.44269e-06	1.44269e-06	1.44269e-06	1.44269e-06	1.44269e-06	1.44269e-06	1.44269e-06	1.44269e-06	1.44269e-06	1.44269e-06	1.44269e-06	1.44269e-06
PM/Scl-75	1.44269e-06	1.44269e-06	1.44269e-06	1.44269e-06	1.44269e-06	1.44269e-06	1.44269e-06	1.44269e-06	1.44269e-06	1.44269e-06	1.44269e-06	1.44269e-06	1.44269e-06	1.44269e-06
Plot values (bottom panel)																Statistics (top panel): P-values were calculated using a Wilcoxon matched-pairs signed rank tests
IgG auto-Ab (Ab-Score) Abs=log2(NFI*SNR +1)	DMSO + Pristane M1	DMSO + Pristane M2	DMSO + Pristane M3	DMSO + Pristane M4	DMSO + Pristane M5	CPD4F + Pristane M1	CPD4F + Pristane M2	CPD4F + Pristane M3	CPD4F + Pristane M4	CPD4F + Pristane M5	AIM100 + Pristane M1	AIM100 + Pristane M2	AIM100 + Pristane M3	AIM100 + Pristane M4		Comparisson	P Value
LKM1	7.58	6.4	6.36	7.52	7.33	8.69	9.22	7.17	8.25	6.06	8.82	8.68	8.15	8.56		DMSO + P Group vs Cpd4f + P Group	<0.0013
KU (P70/P80)	13.53	13.96	13.9	14.29	14.08	14.49	14.12	13.91	14.63	12.92	14.44	15.4	14.94	14.92		DMSO + P Group vs AIM100 + P Group	<0.0001
BPI	12.39	12.61	12.46	13.55	12.76	14	14.44	14.9	13.67	13.33	14.02	13.86	13.69	13.68		Cpd4f + P Group vs AIM100 + P Group	<0.0001
Histone H4	8.14	7.53	8.05	8.43	8.17	8.94	8.3	8.87	8.45	8.77	8.73	8.74	8.78	8.86
Fibrinogen IV	14.08	13.34	13.64	13.54	13.91	14.67	14.56	13.76	14.18	14.02	14.39	14.67	14.19	14.24
La/SSB	13.64	13.91	13.42	14.8	14.09	14.07	15.48	15.1	14.74	13.2	14.98	15.75	15.01	14.8
MPO	14.19	13.36	14.15	13.8	13.58	13.6	14.72	13.06	14.03	13.57	14.74	15.06	14.06	14.91
Topoisomerase I	13.83	12.79	13.63	13.56	13.5	14.03	13.88	13.79	13.39	13.06	15.21	14.17	14.05	14.31
Glycated Albumin	17.54	17.29	17.51	17.63	16.92	17.63	18.1	17.07	17.04	16.37	17.93	17.75	17.82	17.89
Scl-70	13.9	13.66	13.58	14.01	14.46	14.1	14.1	13.99	13.77	13.43	14.27	15.12	14.67	14.55
PL-7	16.45	15.94	16.03	17	16.12	16.41	17.34	16.72	16.77	16.56	17.23	17.89	17.24	16.65
PM/Scl-100	15.7	15.73	15.59	16.25	16.09	15.91	16.61	16	16.03	15.24	16.48	16.26	16.52	16.1
Jo-1	15.91	14.72	14.82	15.18	15.15	15.93	15.53	14.71	15.71	14.31	15.94	15.66	16.26	15.71
Entaktin EDTA	8.97	8.84	8.83	9.7	9.36	10.28	9.66	9.93	9.7	9.53	10.36	9.54	9.54	9.72
Hemocyanin	4.32	4.07	6.15	5.43	5.89	5.14	6.11	5.45	3.86	5.84	7.46	5.36	6.71	7.33
Ribo phosphoprotein P1	11.44	11.9	10.99	12.6	12.07	11.99	12.56	15.19	15.2	11.19	12.18	12.61	13.05	12.68
Histone H2B	16.62	14.89	16.49	16.29	16.42	15.79	16.24	16.95	15.8	15.87	16.87	17.26	16.97	16.91
Prothrombin protein	14.88	15.01	14.49	16.01	15.21	15.5	16.02	14.65	14.93	13.61	15.76	15.51	15.87	16.5
SRP54	11.19	10.24	10.4	11.41	10.11	10.99	11.43	10.34	11.03	9.91	10.93	11.3	12.02	11.84
CENP-B	14.42	13.38	14.24	14.77	14.45	14.34	15.67	14.42	14.78	13.94	14.99	14.5	15.13	15.06
GP2	12.79	13.05	12.38	13.97	12.56	13.6	14.19	13.3	13.22	11.68	14.15	13.67	14.06	13.2
M2	12.54	13.32	12.16	13.78	12.87	13	13.92	12.54	13.19	11.85	13.38	14.38	13.6	13.69
Fibrinogen S	14.91	14.16	14.76	14.8	14.9	14.82	15.04	14.56	14.69	15.09	15.37	14.91	15.13	15.01
PR3	8.31	10.07	8.23	9.97	8.48	9.36	10.11	9	9.43	7.37	10.22	10.3	9.67	10.08
Mitochondrial antigen	12.85	12.81	12.27	13.6	13.4	13.33	14.3	13.02	13.03	11.23	13.61	15.25	13.42	13.53
Ro/SSA_60KDa	12.34	12.61	12.31	12.7	12.75	12.12	13.19	12.78	12.64	10.91	12.79	13.14	12.83	12.59
Ro/SSA_52KDa	14.26	14.02	14.11	15.03	15.44	15.04	15.06	15.45	15.06	13.45	15.84	15.31	14.53	15.87
