# Supplementary material for: ACK1 and BRK non-receptor tyrosine kinase deficiencies are associated with familial systemic lupus and involved in efferocytosis
Source: eLife. 2024 Nov 21;13:RP96085. doi: 10.7554/eLife.96085 (PMC11581429; doi:10.7554/eLife.96085)
Supplement: Figure 3—source data 2. [file elife-96085-fig3-data2.xlsx]

## Sheet: Sheet1
Figure 3 - Source Data 2
Figure 3C: Quantification of glomerular IgG in kidney sections of control and inhibitor treated mice
Plot values (Glomeruli IgG Mean Fluorescence Intensity)							Statistics: P-values were calculated using a Kruskal-Wallis test with multiple comparisons
DMSO	Cpd4f	AIM100	DMSO + Pristane	CPD4F + Pristane	AIM100 + Pristane		Comparisson	P Value
29798.8	19756.7	20201.9	26622.9	27549.7	45353.1		DMSO vs. Cpd4f	0.402
12864	24332.5	20978.1	13670	29024.1	46392.3		DMSO vs. AIM100	>0.9999
24550.4	14127.4	17600.3	12090.4	30779.1	20042.5		DMSO vs. DMSO + Pristane	<0.0001
20689.6	20761.2	14460.7	12328.6	45526.2	42428.7		DMSO vs. CPD4F + Pristane	<0.0001
12292.3	20419.3	20705.7	15726.5	31452.8	36619.7		DMSO vs. AIM100 + Pristane	<0.0001
28851.2	21229.1	17531.9	17019.2	20822.9	39065.2		Cpd4f vs. AIM100	0.0469
12975.4	16926.4	22363.1	14972.9	26446.8	25817.4		Cpd4f vs. DMSO + Pristane	<0.0001
12290.9	22055.7	22926.3	15102.9	18357.3	77178.8		Cpd4f vs. CPD4F + Pristane	<0.0001
12506	16502.1	24575.4	15074	50394.2	28151.1		Cpd4f vs. AIM100 + Pristane	<0.0001
12844.4	27812.8	26454	15058.2	23086.4	47207.7		AIM100 vs. DMSO + Pristane	<0.0001
12582	19561.3	16287.4	15716.3	34611	37679.8		AIM100 vs. CPD4F + Pristane	<0.0001
29438.1	19986.8	30097	13931.7	24649.7	31496.5		AIM100 vs. AIM100 + Pristane	<0.0001
15236	15060.8	16594.3	15584.1	26309.6	32215.7		DMSO + Pristane vs. CPD4F + Pristane	<0.0001
11512.3	21136.8	15886.8	12820.5	30689.9	29089.6		DMSO + Pristane vs. AIM100 + Pristane	<0.0001
14266.9	24658.4	18290.5	14995.8	53476.4	27849.7		CPD4F + Pristane vs. AIM100 + Pristane	0.0095
12724.1	23144	15072.1	15966.7	42915.7	50350.4
11769.5	19110.3	17620.1	11611.9	40155.3	37949
14981.7	22282.3	14545.9	12209.3	34353	20759.6
15481.2	19693.4	17932.1	19607.3	38669.5	38563.3
27397.2	21411.9	21982.2	16845.7	57303.1	34845.7
27093.7	14998.5	21296.5	12830.2	33066.5	26433
28466.7	20148.5	20912.7	11696.9	59883.3	26855.7
36029.6	20416.1	16261.3	11905	58349.3	35909.1
19254.1	21869.3	14471	18121.8	36832.9	34787
16613.7	15814.5	29382.2	15518.4	32793.9	47148.7
26753.7	21462.7	17106.4	17499.3	68808.5	32701.3
38792	18915.4	14674.6	18805.2	48020.4	27817.7
24152.7	26452.4	17116.7	14717.2	33899.9	25775.2
38001.2	19847.5	19336.3	16522.6	55316.2	35132.1
16404.1	15239	19790.4	17150.1	39751.6	35424.6
32547.5	17745.2	19244.3	14345.8	38509.7	40451.2
15673.1	20602.9	22660.1	12125.4	26383.2	27931.4
15404.6	17222.4	13101.2	17111	60517.2	28331.2
33533.9	18271.3	15446.4	13544.6	33421.8	58031.5
18749.1	22018.4	13361.8	13805.1	45446	31171.5
26622.8	21249.2	14594.4	18793.9	29130.5	23906.8
19562.8	16695.1	16899.4	13811.3	25438.3	38837.8
15921.4	24463.2	19779.7	13307.3	45719.3	34443.2
47550.3	18973.8	17660.3	15437.6	66141.7	27219.1
23738.2	22121.5	16378.3	12743.2	26248.8	28453.3
39328.6	13563.2	16668.2	14162	37887.3	43090.6
13072.6	24158.6	18103	13161.5	59616.9	17717.4
29065.8	30820.8	14773	14791.5	43475.1	21778.1
36488.2	17316.4	18368.3	18906.2	34213.3	29576.3
22827.8	32109.5	15008.1	15114.3	42019.8	51443.2
17148.6	22061.7	19949	15155.7	46431.8	31995.9
12621.2	27912.7	18399.6	14955.3	29703.1	39376.5
13908.2	18928	14369.5	14528.6	46256.9	19094.3
12751.2	27718	14170.9	17226.9	27148.3	24029.9
12205.1	24151.9	18773.3	14049.4	42452.9	29814.4
13617.1	19192.4	20197.4	15532.3	45183.4	40938.8
13369.6	20930	19155.7	13267.9	41161.6	42566.2
19090.2	21192.2	14047.1	13088.5	38731.6	41940.9
13031.2	19425.7	21075.7	13401.3	43971.3	17776.8
12284	27698	18440.3	15905.6	39642.8	35608.3
15937.2	19797.9	15781	14939.7	45747.9	23948
16976.2	29193.3	14693.3	16215.4	35824.2	34883.3
13041.7	16701.8	14217.3	11706.5	57799.6	30223.4
13483.7	16884.6	32006.7	11023.5	69459.7	32276.7
13152.1	16892.9	20842.7	14181.9	61993.8	27524.9
13108.2	29938	25848.5	12397.8	22622.3	20229.9
12753.3	30210.6	18481.5	12644.6	36752.3	39920.7
13291.7	18063.1	15186.3	15845.2	59906.6	63750.5
21225.6	20429.3	16822.4	12561.1	33897.7	34015.7
13622	28486.2	21705.9	13156.3	64203.3	35971.5
16558	22791.6	19959.9	12633.7	50668.5	19610.9
13283.8	24721.7	17450.9	10982	35312.6	29889.8
11621	19162.6	16299.8	16081.6	33528.8	22290.6
12319.7	16779.2	17898.3	12677.7	54993.5	29962.9
12626.1	22845.8	18747.6	16172.1	34622.8	34195.5
12245.6	13921.9	12346.9	11731.6	50653.7	29697.7
13612	29431.7	15880	13039.5	48354.6	24811.9
12206.6	20529.3	17686.5	14473.7	56604.6	37263.5
13618.5	20177.7	19686.5	11016.1	24150.1	37684
13713.7	30236.6	18961.2	13629.3	36359.5	26520.1
12351.3	16727.3	14543.1	12502.3	66275.8	25035.4
12989.8	14596.9	17321.9	13060.9	56618.9	36634.3
12172.6	15803.3	17593.9	11175.5	24896	21897.4
15564.6	26686.4	16462.8	12636.3	44127	27770.7
14227.7	32760.3	13102	13701.5	34269.9	30825.6
12942	36961.1	14657.4	12330.3	36536.2	39799.4
22502.7	17044.5	17063.3	13912.8	49446.1	21778.3
14555.1	19069.4	14426.3	13418	34191.7	25038.5
12412.8	28246.8	12962	12701.6	41454.1	20624.8
12046.2	29264.5	18385.9	11813.6	32691.4	26589.9
13919.3	22373	20048.9	15771.8	23376	29278.6
16550.1	17995.9	19326.2	15414.1	34898.9	47997.8
13604.1	24644.7	18120.6	13178.6	43568.8	29212.7
12010.5	31224	17629	10891.4	34085.3	46504.6
13847.8	19697.4	13415.1	12213.1	27301	36252.4
13051	27125.4	16929.2	12797.7	34869.6	23013.8
13635.4	19216.6	19707.8	13123.1	35972.6	40856.9
38999.5	16605.3	16644.2	10806.5	23139.5	27848.2
12687.7	28262.2	14577.7	12508.3	36044.4	30446
13394	30466.1	21182.6	12880	30573.5	62477.7
17876.1	18987.9	17196.4	14895.7	17974.7	28477.5
37523.7	15633.3	14759.5	12436.3	36432.4	33993.4
23892.5	16789	18746.8	12458.6	32824.7	48643.9
19761.8	23956.2	16374.8	12358	23825.2	39307
33613	25576	14451.1	13403.7	37562.8	53866.7
11813.2	23827.1	16567.3	11669.8	27622.4	26198
12207.3	20080.4	15492.8	15753.4	45809.9	32186.9
12431.8	30648.7	20227.2	15149.2	44198.8	27273
15034.4	22375.2	15590.3	15903.2	43356	42618.6
22784.1	34785.3	18964	12588.2	29979.2	50874.4
12034	25862.9	17126.9	12226.3	38133.3	26845.7
25825.4	22307	27524	13269.6	36782.5	33843.9
26666.2	18314.4	14351.5	12414.1	28470.4	40128.1
17391	22336.1	17846.1	14825.8	32102.5	38324.4
27468.3	20654.3	15309.5	12814.1	46361.4	21320.6
12655.8	25744.6	16545.7	14607.6	33862.6	56577.4
24794.1	26277.2	16448.2	13968.8	25197.1	27459.8
12015.3	21450	15222.4	13927.5	30127.7	24659.7
21522.1	19601.9	20035.2	15573.9	35423.3	43249.8
16307.4	19240	17094.5	18520.7	34325	39658.5
22769	25832.1	18789.4	15066.6	60261.4	39935.8
22916.6	23620.1	17335.7	15813.5	22353.8	44249.5
13481.5	12933.2	14604.5	14855.4	34911.3	71811.3
49646.9	22749.5	15310.3	15215.5	56935.3	44368.1
13861.6	25901.2	22147.5	20080.6	27235	42149.4
12961.4	16414.6	27104.1	20778	40327.5	23183
13771.3	24955.5	19125.7	14631.4	35128.5	25101
26122.3	16920.8	28440	13832.9	27842.4	30948.8
14326.1	20934.7	24037.7	13678.7	44213.8	47773.7
13351.3	15071.7	18992.8	18095.7	28871.3	63372.1
18252.1	22338.9	18738.7	18266.8	43482.8	33270.5
15197	22289	17044.8	15699.4	32035.3	53849.6
35323.6	24486.1	13578.6	13706	48447.4	39607.7
12928.3	19211.3	13424.6	16429.4	35293.7	43524.9
18901.2	22373.9	12349.6	15122.8	35518.9	48146
18452.3	27780	15341.7	15220.6	38853.5	25791.2
13392.5	26982.8	15548.1	13290.2	44115.6	43918.2
14168.9	18833.4	14419.3	14438.3	64696.9	32089.2
32226.8	22733.8	16905.1	14522.8	22894	21319.7
28567	24020.8	16447.2	16134.3	25280.4	53422.7
19224.6	23981.8	16864.9	13915.1	41422	31068.1
13609.9	19281.7	19286.3	15777.3	39963.6	40282.6
38450.8	19255.2	15488.4	12545.1	28554.1	39749.9
14839.5	35616.4	18027.7	15148.1	25420	31800.2
12480	19470.4	23447.9	15230.9	32742.8	44095.3
18280.3	39261.8	16919.3	15564.3	41601.7	49665.4
31226.2	29834.3	17015.6	14665.2	41382.9	64946.7
35835	20562.6	15888	22108.9	33143.9	54589.9
12393.3	33009	15112.6	14393.6	33796.4	31689.4
19545.1	23691.3	21547.8	20689.6	30317.9	50199.7
35717.3	17354.1	24243.1	14251.2	32332.9	37775.9
29974.2	26300	22952.3	18083.9	40779.4	54069.1
30971	16457.6	12405.2	17047	37822.4	54937.6
12756.7	15935.2	19176.6	19463.1	35329.4	44835.4
13183.2	26807.1	24076.3	16791.7	47903.7	47661.6
22028.8	25884	32777.1	15266.3	57094.2	39140.1
11666.4	19655.8	25355.2	24820.2	45419.7	43405.7
34768.9	17600.8	22661.3	13488.3	56095.5	36447.5
24970.4	19011	20822.7	16461.1	32347.3	79346.6
11343.6	21252.5	26463.6	13371.6	38032.7	49450.6
15282.7	18384.2	15441	17630.6	37857.1	43257.5
17428.6	29620	21176.4	16630.1	24041.5	34866.1
22111	33525.4	21840.5	15033	31605.6	34632.4
18826.4	19108.9	19941.2	16897.3	25102.7	42862.5
29061.8	20581.3	15894.6	15265.1	27346.4	25938.8
32443.1	17873.1	16659.3	13845.4	35778.9	63948.5
12681.4	18092.7	17151.9	13406.1	27868.9	40571.6
26508.2	18916.2	14669.1	15566.1	25580.5	44556.6
13752.8	19032.2	16344.7	13449.1	23798.4	64101.4
17447.6	22430.3	14313.3	19437.1	23225.1	51394.5
13560.7	16004.1	17909.8	19804.9	21903.2	24450.3
12550.7	27697.3	16468.4	15341.2	27347.6	27813.8
11875.4	14298.6	16929.8	22966.4	17183.6	35011.8
41041.8	19902.2	19148.6	18844.3	34677.4	58727.3
13960.4	22502.9	22126.1	13299.1	42785.5	46301.7
27768.5	30635.3	12836.7	12757.2	23248.9	52495.6
16787.7	25726.3	13589.6	19923.7	27784.7	32722.2
17747.4	33790.2	21560.9	14437.3	19725.2	58537
12090.9	16030.8	17261.7	18378.8	19595.2	89580.6
14121	22305.6	21744.8	13712.7	42174.3	56022.2
15685.7	22163.7	23109.2	12777.3	37286.9	22458.1
11182.8	19804.2	19549.4	12848.2	27633.6	42204.6
35406.9	17596.2	15848.6	13631.8	29549.7	37445.1
11585.5	17820.3	16856.8	20442.1	39876.7	47170.5
36189.8	22212.2	27265.9	11787.7	31193.3	42450.6
20094.9	25007	15592.3	14808.2	32792.4	39057.6
42754.7	20712.2	16566.7	12697.5	21198.1	23658.2
21019.9	19684.7	19779.3	18504.2	27083.9	22121.8
11478.7	16448.3	15832.1	11788.8	34875.3	26427.3
26752.9	16615.1	17119.9	15408.8	28842.5	27936.6
17835.2	14557.2	20400.5	13520	21597.8	33742.8
14286	21519.3	20019.4	12834.2	30240.5	44707.1
12130.6	23119.2	19062.7	13896	27228.4	39339.3
12480.8	16487	26824.3	13092.1	37246.7	44504.1
12475.8	16225.3	15801.8	13625.5	28905.1	54674.6
11966.4	26130.6	13031	14712.3	18825.5	37868.7
12006.7	22962.4	18176.9	18186.4	60096.3	21014
12489.2	18523	22041.2	14311.9	34151.7	31055.4
12700.8	24119	31580.6	13936.2	34439.5	36607.9
12244.5	22943.9	28927.3	18043.8	30862.4	53766.4
12295.1	22448.6	36490	13935.9	39664.4	38033.6
11903.9	25673.2	17678.9	15679.1	54748.8	45554.5
11813.7	24614.7	31650.8	11600.9	53714.9	53635.4
11559.7	20392.6	22798.3	12803.1	49705	41323.6
11683	20927.7	18252.3	15673.4	32184.8	42528.5
12456.2	20856.2	41554.3	19684.4	77386	55065.4
14156.8	18596.8	34193.8	14287.1	31288	55578.8
16967.1	25081.2	32363.9	14401	39201.3	38377.2
14518.5	20895.3	35384.2	14422.4	57076.5	57779.5
14388.9	22827.3	28677	15320.8	37437.9	24700.5
12826	25634	33383.2	26661.1	56493	31641.6
14387	21421.7	20794.5	18510.9	45013.2	72793.9
12873.5	21820.2	20483.8	12869.7	57840.4	31958.2
13036.6	16027.7	37039.7	17290.1	79243.1	27859.8
13945.2	21881.3	27073.7	14356	69732.3	20267.8
13977.8	18560.8	38621.3	15222.4	75826.8	36515
11682.4	33764.9	33693.7	11172.4	87684.2	32171.3
15527.4	17055.7	25866.3	21444	63747.7	38425.3
14978.5	17579.4	29750.7	13354.9	30425	33412
11919.9	25397.9	22671.5	16280.2	37830.5	45294.4
13048.2	22817.8	42666.2	14606.9	37441	32694.1
12516.6	20663.6	27542.6	16907.6	29041.9	49268.7
12258.6	22867.7	14366.7	12571.8	52147	33281.9
13555.7	20374.2	15559.9	15938.9	61331.9	42153.3
12002.9	24886.1	19347.5	15449.4	48238.9	30104.4
16579.5	17291.9	14781.8	17307.4	40384	30310.4
12319.5	23483.8	12886.8	13657.7	43054.3	45534.8
15229.9	16929.9	18889.3	18508.8	35628.2	25111.4
16250.5	24635.1	19313.7	13947.8	40975.1	33465.1
12286.3	15498.9	22316.2	12608.8	36755.7	49561.9
19313.2	17449.9	14067	18202.8	130999	35911.8
12643.7	30656.6	12868.7	15662.7	51446.8	24452.4
13097.2	18333.9	15216.3	10989.2	47636.2	16325.1
15665.1	16854.5	18185.8	12251.6	60781.6	43570.5
12707.2	24215.1	23110.3	11489.3	43690.9	67789.1
12221.1	18967.9	12272.9	11185.7	41096.1	36918.2
18211.3	17300.3	14757.9	11168.7	34748.3	23641.5
16760.4	16060	14803.9	12763.6	31031.7	39530.5
15928	23417.7	13196.2	12328.8	31349.7	26924.1
13294.4	20056.1	20070.1	12558.7	26479.6	30749.7
13222.5	24539.8	14213.4	12197.5	57489	35629.5
15563.6	22697	18203	11040.2	42857.9	39169.5
13513.2	16192.5	19616.5	13135.8	113686	25528.4
12521.5	21134.5	15986.4	14004.2	51562.3	43774
11895.1	18397.9	35699.2	11628.6	51476.3	29107.3
13895.1	15237.9	18843	11532.1	63870.6	22502.8
12789.5	19658.6	26038.2	12778.8	37886.2	29924.4
13281.5	25277.3	34462.8	11273.8	62402.2	33833.4
14641.1	21786.6	15734.1	12636.2	66323.6	42147
12294.7	19102.5	23291.4	9795.638*	60097.5	31351.4
13377.2	17948.5	15192.8	12890.6	43394	38385.2
12321.9	17387.2	27763.1	11535.2	56754.5	76498.6
12627.8	17206.5	28371.4	12021.1	61941.7	41594.2
14507.8	25067.5	20646.2	11121.8	58809.2	44294.8
19340.6	30376.4	22891.5	11408.6	46968.8	35288
29907.6	15680.5	22254.3	11936	56004.7	49408.7
17771.3	33545.9	18406.6	11705.5	70569.9	33459.2
18646.4	20834.6	22917.8	10736.5	43279.1	45648.7
35917.3	29699.7	21021.4	17883.6	44392.7	42102.6
15118.2	18473.6	19456.6	10979.2	64998.1	47918.5
23322.2	32767.7	16214	13293.6	42479.5	39465.3
17601.9	17979.3	27132.3	12756.5	63648.2	48927.6
18602.1	22388.6	21879	11737.1	58382.7	31203.1
27119.7	17914.6	29807.5	14771	31040.5	21870.2
19199	28824.9	23729.5	11806.8	32281.2	53512.2
13148.3	18921.8	19399.9	13435.3	97246.7	25426.6
12911.9	20309	20534.4	12256.4	55584.3	17283.4
12830.7	18342.6	15913.1	11615	51347.2	35826.7
12564.6	18862.2	21037.6	11243.7	51552.8	46761.4
22692.6	22615.1	25022.6	12555.9	39725.4	25210.8
17951.8	21073.5	19276.5	12986.5	45750.4	28978.3
11200	27479.8	28130	12227.3	74462.2	26452.4
13773.3	18825.6	14288.3	12254.9	28913	35325.7
14604.4	16458	29178.9	16175.8	64585.9	20564.9
37062.3	17438.2	17187	11218.2	46567	45589.7
21260.6	19691.4	22420.2	13377.6	46108.3	28205.5
17906.9	18208.3	22423.3	12785.7	55362.9	40109.2
12701.8	20868.9	30085.2	13320.2	54860	47671.1
15578.3	19757.2	29348.9	11535.3	62256.9	37105.1
13242.9	22774.4	15452.4	10742.1	69994.5	53938.1
13861.3	24986.1	18224.4	11223.6	76692.6	34063.3
16648.2	24184.9	15856.5	11612.9	37096.3	37193.4
12812.1	17990.2	17514.3	12115.1	26378.6	37802
13531.5	18054.7	15141.6	10601.4	37002.5	26089.2
13257.5	14970.3	15681.1	12450.7	48039.9	37384.8
15540.7	26167.1	21858	13258.2	35105	65205.5
17206.9	16776.4	19061.5	19419.1	31752.7	47231
14705.9	31824.3	19480.7	15255.8	47581	90174.7
13744.3	32262.6	20065.7	52949	41062.6	28903
17018.1	39039.1	27934.2	19865.9	55050.6	34012.1
14532.1	34632.9	13038.1	28056	55682.5	40364.6
16492	46691.5	18956.7	24684.3	49317.5	60094.9
13045.6	51179.1	17129.4	33412.9	46384.5	43314.7
15300.8	47872.1	16296.1	44385.3	45006.3	35995.6
15073	40878	22614.4	40592.9	50652.2	47398.2
18005.1	35158.9	15870.5	56796.7	48194.2	66600
19949.5	44199.2	14720.1	34430.2	43938.7	58758.5
19549.3	46308.8	27230.5	46261.5	47897.9	58804.3
15196.3	80206.9	14778.3	34076	55764.2	50070.8
15932.6	60541.9	14066.5	27805.6	65777.8	33041.7
19380	54596.4	13697.4	38405.9	41355.2	60641.7
28073.1	59045.6	14171.9	49266.8	47772.7	38547.8
27521.6	63246.3	17493.8	24689	40297.9	46611.8
20649.8	32907.6	15014.7	31542.5	48430.9	46797.4
14255.8	37275.9	20213.8	54273.4	43916.5	129671
32293.6	76031.9	15839.5	26905.3	44036.4	84515.6
29084.9	50843	13213.6	19676	59404.5	60583.9
16562.9	64260.4	18695.9	29958.2	34331.3	59859.5
15678	47400.1	18004.6	32601.4	34534.6	52462.1
29908	57411	28741.9	48302.7	35440.5	39541.3
26120.3	38816.3	15366.8	41739.9	62953.5	37327.2
34315.6	35323.3	22540.8	52027.6	59192.3	102163
31287.4	66896.4	12291.9	72199.6	53229.9	168768
35545.1	36585.1	17672.4	94935.8	47642.8	62612.4
40553.5	25780.5	11295.2	52811.5	76521.2	60614.4
39377.4	58729.6	12285.7	83595.5	58134.4	70883.7
20965.7	50265.9	14165.4	32960.2	66283.1	54574.9
30970.8	39105	15340.6	58244.5	49950.3	35279.7
30148.9	47875.9	18115.9	36202.8	46057.9	32275.4
22127.2	65939.4	23040.4	43792.8	52828	44018.5
18946.4	53444.4	22464.3	18697.3	103960	66765.3
18240.9	39917.3	18053.5	55704.3	75805.4	130530
25925.6	50515.9	24005.4	65008.3	80093.2	161058
35195.5	57131.9	16070.1	100071	78402.3	44267
39347.2	38948.1	32111	59521.1	46549.1	65748.1
17229.6	18111.1	23138.7	24583.3	63363.4	47865.8
18210.5	18646.2	29347.6	30096.8	50523	59871.4
36275.2	18832.9	26733.8	74296.6	54535.4	46266.8
17394.2	18538.2	26789.1	28726.7	46171.5	70607.3
36660	15143.2	13909.4	39829.2	47395.8	49499.2
21996.4	16375.2	13147.8	38284.9	54398.2	68660.9
44330.1	15626.3	16987.7	16041.3	57832.2	53980.4
15389.3	15202.6	14557.3	34170.2	60539.8	50318.6
15895	16355	16546.5	49865.7	122714	47476.6
17516.5	20033.5	14285.1	32409.6	73356	71463.6
21903.5	20859.1	18317.9	31872.1	74222.9	50504.6
13698.5	18967.8	22158.8	36680.1	88327.6	124775
39995.3	16604.5	18954.3	54752	83442.2	136754
37773.6	25548.8	12941.5	55300	51987.3	43230
19212.5	22296.4	35332.5	27144.7	60449.8	56358.8
13880.9	73063	18808	29996.8	58963.9	54889
15612.8	19122.8	29353.5	38242.7	93420.1	89964.5
29948.6	28127.3	20738	69755.5	41946.8	41033.5
18481.5	49827.5	15856.1	30545.9	42192.2	90637.4
34050.2	43993.3	35853.5	42059.2	31376.9	39667.9
28098.4	36852.9	43778	24982.3	68743.2	111534
25307.1	67040.2	31782.1	16065.8	58877.3	141675
30761.2	33411.9	38378.8	27578.9	56954.4	139940
30069.8	67052	24948.8	18109	51872.2	110873
19082.4	43793.8	50329.6	29799.9	125343	85290.9
18469	32609.8	68391.8	20183.7	72171	81429.5
44124.8	34916.3	38024.7	17563	76529.7	72574.9
19505.8	39074.2	28676.4	17306.6	66813.4	88941.7
28564	27928.4	51374.1	17116	27401.9	81594.4
20370.7	21862.6	34011	31391.6	66122.1	57781.4
19043.8	21122.9	26075.5	19162.7	58685.5	77113.5
23121.5	20325	22727.2	34594.9	61103.5	124105
22504.8	23024.3	35913.9	26644.7	63517.1	63342.7
12779	20800.8	22113.3	17568.8	49370.9	168351
17638.4	43706.1	26252.4	18309.6	78253.8	84575.2
25137.8	52991.9	26630	22132.8	97726	73154.7
48205	20501	25122.5	26181.8	80848.9	64367
27041.2	25540.8	37017.8	34726	123452	104259
13905.5	25478.4	24012.3	16246.8	56718.4	43124.4
32255.3	25705.9	57364.7	20520.5	129164	98192.4
16599.4	34924.8	29040.2	23544.8	33732	50311.5
29070.6	27336.8	25664.5	14843.2	120354	116272
17869	29169.1	26059.8	16387.2	108202	87348.5
12644	38965.5	55471	16533	94234.7	41246
21655.5	30584.1	34088.9	13996.2	41542.7	79507
17309.2	54003.8	29777	36687.5	94942	107673
34723	51733.7	34495.7	24063.6	74817.5	191091
37342.3	37136.1	23935.8	38696.2	116818	127073
28103.5	24712.9	30354	28251.7	54003.9	45546.2
27964	33508.1	21591.8	17270.1	62597.5	94432.6
24938.4	42951.8	38441.3	27733.8	116827	107606
39760.5	47975.1	46500.8	48590.9	73952.7	51564
29217	58500.4	27844.7	34294.1	90497.6	140623
27545.2	42488.4	32438.8	17936.1	117987	109862
26059.5	59800.6	36696.3	36913.1	74350.8	79631.4
31986	41518.9	58395.9	57113.1	96721.6	66488.4
14495.3	67022.5	39817.9	18463.2	57947.5	33310.5
21384	50180.6	32689.9	28939.6	115026	55166.8
30427.4	38474	32758.6	25851.5	57656.5	32596.4
33127	57357.7	37837.3	22165.2	66502.3	86333.4
36304.8	47321.2	25094.6	29819.5	63977.2	73293.7
21013.6	41228.8	25131	37614.9	54880.2	45437.1
20152.1	60754.2	49434.8	29224	55754.8	124722
23042.2	64035.4	30163.3	16603.1	75464.1	80349
28496.5	19671.9	30088.5	15709.1	98027.5	111662
33665.8	17999.4	62767.2	28410.5	124700	120215
39144.6	32869.3	28769.2	31119.6	90570.6	60205.9
27118.7	30446.4	28417.8	46044.7	92836.3	239058
27390	23852	33076.1	25014.4	79386.6	116241
28602.3	31967.7	38025.1	15089.3	71953.5	105967
14031.5	35370.6	16295.6	31543.2	93009.4	130378
20852.7	19832.3	30679	16623	81763.9	99814.1
31274.2	55377.1	19021.9	30392.7	86290	72357.7
12402.6	51658.8	37358.9	26612.8	79169.6	98714.8
11223.7	28686.7	23453	29813.3	45616.4	76726.5
12042.1	34241.7	27528.8	39124.3	87342.8	100241
11962.8	61020	25853.3	58284.8	52881.3	99423.7
13352.1	42857.4	27752.5	61702	110465	89534.1
11596.1	23544.6	50001.8	23481.7	50527.5	65258.5
12540.1	27132	46171.3	32718.7	62317.4	101599
11199.3	32753	18790.2	55577.1	66408	72643.4
12412.6	22242.1	25566.3	37302.5	71314.8	118794
13812.1	30308.9	27666.3	97184.4	48734.6	122925
13306.9	22563.6	22209.7	56208.9	66965.3	52792.6
12857.5	46248.7	23333.8	26775.2	47240.1	25473.9
12425.8	31734.3	76854.1	73206.3	53353.2	113354
12102.9	19998.3	33890.9	47083.8	38404.7	120525
13599.7	41426	21620.2	25172.5	73473.6	53369.7
13324.8	26956.3	19973.8	25545.9	47785.3	84621.3
14527	21043.2	22396.7	36650.3	59041.1	53111.8
13577.3	21611.8	20117.2	38049.1	42585.9	99010.8
13662.5	24492	36408.5	81477	52149.9	85071.2
14167.6	33779.7	24129.1	66388.5	69492.4	57411.6
13942.6	21881.2	42345.5	48479.4	48939.5	113810
17293.5	45738.6	19362.2	31711.4	61511.8	76205.6
21472.8	37115.3	39117.3	43362	44453.7	80507.1
17567.2	37172.6	13000.8	39800.3	89660.1	85735.9
18515.9	40352	20407.9	15860.1	51235.1	73973.9
32350.3	28037	33547.7	15212.9	53619.9	66481.5
11429.5	26695	30826.5	23099.7	31459.4	91130.8
33598.4	36448.2	19741	14536.9	56099.3	94223.4
49853	33839	23458.2	17273	51697.6	94212.8
34594.2	17639.7	33898.3	21825.2	48946.6	55501.6
15732.2	28915.6	29383.7	19861.5	71048.8	50835.9
17715.5	37006.3	20154.1	23527.1	59466.4	57811.1
22813.7	33881.8	19162.1	13233.1	50548.3	43383.9
33510.3	27434.7	23419.2	21952.5	45040.2	54312.7
16155.1	22097.1	17299.2	15285.5	52549.6	38055.1
39487.1	23794.2	42896.7	16755.4	46954.2	85036.8
16601.6	28764.9	22129.3	15741.7	56002.2	24762.1
32200.8	32559	32299.8	22616	69500.7	68047.8
31999.8	29063.5	25065.9	14817.1	46556.7	43922.1
29477.4	30473.7	32333.4	18183.2	55318.1	27370.9
39768.8	38722.7	35398.1	16966.5	59733.1	39302.5
29736.6	26102.2	53326.2	12856.3	46686.2	49704.6
31979.8	24375.2	29269.2	15046.1	55137.4	30727
36166.1	29610.4	45935.8	28036.3	37134.7	32750.2
31493.2	33620.4	22783.6	22258.3	52766.1	28281.5
21856.7	22965.7	24629.5	28033.6	48141.9	56683.7
46199.8	37950.2	46791.6	19182.4	70394.9	28800.8
34451.4	27848.1	20239.8	14994.6	60105.4	34399
43877.2	26731.3	24392	19189.4	62779.6	31245.3
16471.2	21868.1	87428.8	19218	50529.1	34341.2
41837.7	24639.2	58879.2	17328.5	86124.1	32479.5
21782.8	25474.1	57234.8	26516.1	56378.2	33809
21603.1	32367.2	22023.5	29528	55654.4	29245.2
15248.7	21481.2	29017.6	18132.1	66660.2	23946.5
29825	24639.7	26119.1	17766.9	50360.2	33992.3
24618.4	26835.8	25388.5	18210.8	74469.8	53570.8
18263	23439.5	58103.8	27757.6	57598.4	26058.1
18218.8	38681.5	35959.2	12206.2	60486.2	32135
21808.7	36957	17090.6	13896	66323.3	58202.2
30540	36264.6	66314.5	14000.6	79172.7	45518.9
27290.9	31319.8	43901.8	12585.7	43165.8	27689.7
25712.6	30601.4	18899.7	17947.6	79089.6	43640.9
33364.2	33559.3	40508.1	19877.7	45451.2	34052.8
32209.3	26629.8	49830	16675.9	46053.8	34074.6
41302	33951.4	20431	19370.3	42174.8	42851.2
21657.6	29061.6	15820.4	29387.6	75151.5	45337.8
23659.2	27421.5	17263.5	17961	54606.4	35427.1
17731.2	19387.7	22559.7	19061.2	59046.2	35059
18684.6	19760.7	31825.2	26945.4	103304	55294.5
24325.2	21030.2	20692.9	27107.2	37250.1	67240.7
22454.8	36095.3	23929.8	25134.6	71272.8	56229.7
25791	32246.3	20843.3	13799.2	74986.6	51956.4
20399.5	21105.8	20919.8	28001.9	54823.6	36165.4
36500.9	27158.5	21993.5	20402.7	75600.5	42505.9
23493.3	26807.4	22986.5	12564.6	76742.1	47612.9
32307.2	25814.7	15005.2	22753	80998.8	34716.4
26619.5	37927	21370.6	19120.7	54432	32904.3
25670.4	31315.2	15906	14406.1	54427.8	44823.6
40032.1	50453.2	14675.2	14612.5	44456.7	50160.5
34754.4	24520.4	17706.3	14163.7	65235.4	31111.9
28651.3	35548.1	17675.3	19874.4	37521	27911.7
23050.5	26422.2	27164.5	22134	65340.2	31631
21597.6	39430	27825.3	15444.1	40584.5	56680.1
12242.9	20899.3	20789.4	29868	46547.1	19095.4
12924	31445.5	21188.9	24921.6	42856.5	34492.1
11468.1	26240.1	26506.8	17324.3	43256.3	44082.5
12906.9	46468.4	27770.7	15454.1	34619	27472.3
14641.6	31438.8	19636.5	17098.6	77311.8	36553.9
26325.2	36425.2	19671.7	16669.3	47409.4	40056.9
11983.9	24134.9	19746	20080.8	34156.5	28892.6
21428.6	29544.6	20562.6	15720.2	45289.2	53707.8
17548	32336.8	17448.2	15035.2	39210.5	36340.3
20111.1	42580.8	33419.6	17454	38987.8	40779.2
11431.8	19547.6	16746.4	24451.3	26063.1	46931.2
11704.2	26672.9	18761.5	15272.5	31631.1	64614.4
11403.3	26369.7	15770.1	19352.3	32892.9	23888.4
16229.7	39262.7	19613.3	19248.3	36648.3	34392.5
13579.1	37801.6	23056.5	17770.8	41591.5	38317.5
11264.5	28465.4	19618.8	15678	23698.7	22793.3
13022.3	25926.4	22787	20868.6	44245.8	83736
11218.6	24834.1	23098.8	14431.4	36036.8	47154.4
11629.5	36047.2	21207.4	17431.1	51063	70483.4
11435.8	26128.1	22945	16298.2	39404.3	39529.4
10791.1	39718.8	24159.4	18454	22764.8	44238
13936.8	28262.2	15285.9	16586.7	38311.9	32304.8
14833.6	28288.4	21814.1	15272	32360.4	29584
13934.7	46320.5	22277.6	18116	39042.9	67027.9
11302.1	37338.3	19995.8	15370.8	41517.3	39645.7
11981.9	25536.6	19904	23365.1	27883.1	33448.7
14991.9	48790.5	24010.1	18443.4	47764.8	49030.1
12045.1	37416.6	18025.6	15654.1	66440.5	30969.1
11287.2	45335.4	18185.3	14974.7	35314.8	44407.6
12587.8	28201.1	17121.2	15152.3	33313.8	34746.4
12541.2	21185.1	16484.4	18422.5	43437.9	20920.6
11413	33657.3	23951.5	21657.4	50847.4	63904.2
11170.3	23642.1	17021	21471.2	27972.1	35487.4
12443.9	20773.5	16764.5	22286.1	37241.1	49189.5
12977.9	28845.9	14938.8	18174.5	35907.8	29907.3
14472	24315.4	13126.9	22299.2	38332	72784.1
28396.1	42007.9	12039.6	36311.1	44374.1	66087.6
15578.5	19003	20884.4	19492.8	32808	57032
13021.9	33604.8	21202.7	26327.5	80900.9	26934.6
14000.4	28891.3	17514.8	21038.2	31369.6	51600.4
13549.8	31190.4	15934.6	36739.7	38598.6	93563.1
18240	29613.3	17916.2	22084.2	45457.5	52922.2
16902.6	27101.7	18777.5	23489.2	27917.5	29844.7
17050.6	40059.4	13299.8	19621.2	53381.3	64399.2
19263.2	25723.1	15298.4	18666.6	42675.2	48338.5
19435.3	25218.8	15031.1	13615.5	35476.6	75290.1
11930.3	34790.9	14811.9	12418.1	71552.4	82936.5
13777.6	35358.4	17851.4	16422.8	18845.2	40915.3
11305.6	19594.1	12296.7	20512.3	40488.7	48074.2
15408.7	48203.5	14292.7	20127.2	32761.2	40493.9
15721.3	35163.9	14802.4	15578	24162.6	48208.7
13113.6	21442.2	21239.7	19019.8	23023.5	34458.9
17666.6	36702.8	13028.4	13421.7	30185	43868.9
13518.4	26451.6	15449.9	14394.7	30616.1	44539.4
18111.6	31600	11431.8	21850.7	24446.2	71616.1
14843.4	28199.2	19544.6	19227.7	34461.1	32027.8
18310.7	34587.9	14221.2	15065.5	25823.7	77898.5
12547.1	24515.5	23948.6	17907.1	24247.8	65730.4
13419	29064.8	21069.7	12508	28030.1	39826.3
11568.9	19777.8	24912	18345.6	26782.7	37585.9
11745.1	23081.8	19718.5	12207.2	32785.9	45966.2
10972.8	27690.1	17721.5	15166.2	26459.5	36705.2
13235.9	28705.5	23402.5	16793.6	22777.7	71035.2
15300.5	25276.2	14910.3	19489.9	36206	24361.1
14464.1	32897	15885.2	13809.9	21082.7	26424.2
39077.7	22456	19516.5	17718.4	20815.2	43742.2
32377.9	38126.3	14197.4	12649.1	20328	48898.1
24542.2	22715.4	13059.1	13548.3	26725.9	70251.1
21430.1	20362.9	18573.4	14480.6	22171.5	46606.7
19024.3	42004.1	15866.4	13653.1	39533.3	50991.2
14918	23024.7	13116.1	14784.1	27996.5	108141
34324.3	21251	13929.2	15783.8	37359.2	53680.5
12096.8	26981.8	12337.3	14150.1	45118.9	49976.4
11553.1	22528	17293.8	14226.9	44289.2	154789
11536.1	25825.9	12593.2	15947.3	23782.8	62676.2
41207.8	27339.1	12062.9	12133.1	32479.8	56967.7
19886.7	33476.2	13343.2	14591.1	35607.7	85884.7
28051.8	26089	12345.4	18017	24977.9	38790.7
31576.1	33321.3	22342.9	12181.8	29807.3	54899.9
35429.5	19496.3	18813.6	16689.2	21803.5	57628.6
15464.9	28336.8	12492.4	14305.5	27281.8	76724.1
14539.8	27558.6	21028.2	12220.6	40141.6	40292.5
14151.8	35417.8	17439.7	13822.7	19697.4	51499
26549.3	21422.3	17128.6	13040	29576	59654.7
15782.2	17921.3	17669.7	21386.1	24584.2	27867.4
36719.6	27501.2	12912.6	18834.5	23291.7	19977.7
21843.8	29288.1	12659	13619.9	30037	43620.2
25066.5	28292.7	13651.4	19946.2	20653.2	36542.3
23511.7	23235.4	18732.5	16294.2	17592.1	86721.8
16884.6	25251.9	24546	26255.5	29826.8	39714.4
31678.4	29753.5	12195.8	18901	76426.5	76478
14498.4	36422.2	12901.6	18731.5	40313.2	55577.1
14156.2	39084.9	13908.3	21652.5	26838.6	46307.1
16674.7	28447.5	24423.6	15327.7	20704.7	45907.2
35101.1	21119.7	26326.6	26723.9	22943.2	116975
19228.4	20335.2	15728.7	19451	17778.2	56976.9
13167.2	27660.9	14313.5	26106.2	21422.6	44221.1
14511.8	33161.7	13462.1	27142.5	30179.4	37785.5
19392.7	18625.4	18366.5	22381.2	24494.8	19458.9
19343.7	31278.5	12402.5	19134.5	56634.5	59960.1
20553	23403.5	14245.5	27082.6	25076.4	61942.7
14910.8	32691.5	15937.5	22574.5	30087.7	31327.4
32295.7	33480.4	20056.6	17035.3	27226.8	55683.5
30528.3	25788.2	13045.5	21398.9	31726.9	23145.7
34517.1	22377.1	15029.1	20454.9	28637.1	36562.4
19674.4	30454.4	13724.1	20713.9	56171.3	65569.7
18047.7	21713.9	12759.2	20739	32208.8	45725.5
18091.9	26574.3	12222.7	17973.2	44630.4	74863.5
19016.4	19781.3	17737.8	17677.8	48106.4	40042.5
17781.7	22121.3	12395.5	21077	22106	25439.9
40510	18839.5	12760.5	15788.6	18039.6	41969.8
39804.5	24159.2	13990.4	14642.1	27376.6	40394.1
23038.2	30040.6	12427.9	16823.1	25076.5	35636.9
34453.8	19384.4	12410.3	11627.1	40023.9	24942.9
30070.1	20713.1	17012.4	12707.8	40023.9	25280.7
28782	21454.5	15088.1	13440	24517.3	59600.4
32658.2	21826.2	13837	11789	24814.1	34661.9
19168.4	33795.3	24271.2	11614.8	24096.4	55737.1
28467.7	24439	24005.7	22806.3	21857.3	39701.9
39040.3	21931.7	25841.8	19304.4	21604.5	55945.8
39407.9	19460.9	34159.3	20523.7	18484.6	24382.3
19284.8	28798	34013.8	15459.4	56893.8	30658.2
23005.5	31935.7	25564.7	12205.8	16184.2	37591.1
34548.7	24705.4	29856.2	17567.8	16220.3	89405.7
21854.2	27397.9	22647.4	12336.1	18717.8	96908.1
28497.8	19653.9	23463.1	14115.5	22770.5	37160.3
43088.6	31442.7	29536.3	15437.4	13347.6	25856.6
31712.6	50066.3	34771.6	13457.1	17672.1	32714.6
23517.1	45958.1	24501.8	15519.6	26139.8	23419.1
13896.3	28761.9	18511.5	13789.1	21683.9	34775.2
30638.5	24688.6	20184.5	15517.2	20467.5	45137.3
23998.3	30866.8	24498.9	19711.4	15301.1	31791.3
18439.9	17253.6	21454.3	14805.9	50465.6	36944.9
20551	26624.4	24961.5	15233.7	37099.3	36218.9
12209.3	15030.6	19913.5	14735.4	53001	51977.8
19337.1	24342.9	31005.5	24069.4	50943	62829.4
16290.4	35995.7	41376.2	15558	42064	24610
18959.4	15657.6	39720.3	12189.6	33939	43005
27652.6	18955	29678.9	13137.3	73422.8	38538
20246.2	21868.7	42461.3	13054.1	45053.9	52953
16707.8	26171.5	15636.5	13963.5	65363.2	51171.4
18003.7	42017.2	20849.8	27667.2	45116.4	35767
14945.1	29036.5	19636	21280.8	40900.2	36283.9
24766	18294.5	17424.4	15003.7	49904.5	44795.8
28458.4	26203.8	25742.7	13679	36465.8	37268.8
22999.8	21663.9	14952.9	22951	30424.3	50464.6
27394	26295.6	13061.5	19787.3	47308.6	81628
25258	27104.8	16856.4	14741	54340.2	22927.2
17877.6	24625.9	18688.3	13149.8	51104.7	43007.4
14005.7	26002.1	23697.6	16059.4	48821.4	22975.9
22747.5	25260.1	21998.7	16523.4	42766.6	46876.6
12453.1	25643.4	18240.7	21914.7	38073.4	43109.8
25674	37963.4	30142.6	19608.4	33803.5	47001.3
24156.6	17618.5	30301.4	17030.2	49860	42363.6
33510.9	23786.3	27689.5	12639.2	47289.2	31657.1
21761.9	23667.2	32953.8	13741.9	37405.6	38926.8
30637.1	30526.5	22291.9	17612.6	46345	50103
29579.3	22590.1	33910.1	13779.3	27169.9	26926.6
16800.7	29254.4	35105.3	19004.2	36572.9	77540.2
16616.3	24992.3	13892.6	20449.4	46972.1	104136
18041.8	18637.5	19723.6	12348.8	44337.6	57254.9
17847.2	26609.6	25260.3	12718.3	45473.2	44208.8
16945.6	22939.3	13198.4	14211.2	30680.1	26113.8
17883.9	43145.3	17197.6	15364	61349.7	46231
21866.7	22359.8	28925.5	14112.4	44812.2	129541
23401.8	21335.4	27985.7	12528.1	16891.1	47308.1
18593.4	25151.1	18948.4	15319.3	19131.9	26774.9
20228.8	20917.5	22420.7	14496	19979.3	24585.1
18204.6	27802.3	18789.6	14699.1	23566.3	24638.1
22036.1	24389.9	24691.8	15232.6	54417.9	35669.4
22566.4	26958.5	25300.9	50697.1	52326.5	29500.9
29006	20029.1	18324.4	66247.1	53452.3	51186.5
15596.6	21932.7	16960.7	64778.5	58568.9	48681.9
13510.3	23474.4	18421.7	45243.8	44958.8	54291.2
23561.6	25719.9	18899.2	44537.6	22584.5	23663.2
21747.3	34571.3	13527.8	52732.4	21306.8	55845.2
26263.5	18580.9	19683	25591.2	29142.2	29125.2
16209.8	17244.8	21107.8	69525.3	29110	80030.9
31087.9	17108.3	15168.5	61402.3	17108.2	44758.2
23128.9	45168	16764.4	46681	28181.4	82840.3
12938.1	42180.7	17273.2	37305.4	27929.6	66961
19588.7	23905.1	15196.5	50234.9	25103.2	61235.2
23068.3	24554.7	28107.4	30858	22623	45987.9
14191.8	15074.5	27329.9	68475.3	22342.7	36584.8
24856	13847.8	26055.6	34004.1	26043.6	72714.9
28286	13383.9	26391.1	59720.4	24793.7	43499.8
22852.3	15138.5	34337.9	22085.4	26596.8	60734.5
19600.7	14190.6	33691.6	47151.8	21121.1	62121.2
19963.8	13183.7	26568.9	49707.9	25572	87918.2
17567.4	14906.6	29391.4	52960	25754.3	52558.3
19616.6	15624.3	21951.4	71381.2	25892.5	68777.3
22307.3	13490.2	36115.1	28384.1	27495.7	82761.6
28184.3	14739.1	18519.9	22466.5	19730.3	90718.7
21662.2	13214.5	15535.4	26134.4	29403.6	48320.5
16883.5	14912.2	24442	35551.1	20905.7	38548.9
22658.2	15349.1	23700.5	57197.7	24430	51720.2
23352.4	16991.5	18889.8	24657.5	29423.5	78884
18589.3	13817.1	28476.7	41510.6	18094.6	38878
19284.6	13574.6	16263.1	35560.1	27744.5	54698.1
17563.6	14021.9	29268.4	37381.5	15429.3	49647.1
32395.3	14056.1	22425.5	45593.2	31240.2	42749.4
21738.4	12450.6	19475.8	23634.3	37600.1	49695.6
19452.2	13050.3	12320.7	28261.2	29036.7	46976.9
14977.3	13301.1	13365.3	29907.9	24697.2	42625.5
14457.8	14192.4	22464.9	65931.8	18530.7	41379.4
17167.2	15787.6	14078	45350.4	27931.5	38720.4
16222.6	14647.9	12543.3	23541.2	24368	57307.6
16166	13057.5	16196.6	49692.2	31968.9	100447
16012.4	13839	17444.1	31248.2	30151.1	44092.8
18249.1	13884.7	21103.5	26852.4	15486	37816.8
12501.7	12621.7	16060.3	52643.4	27215	76337
16883.6	12698.3	22154.3	73379.4	29773	58892.7
19451.3	14344.8	21193.8	26364.3	32644.1	38097.7
17069	14783.3	16280.6	33157.8	27316.1	35366.8
17071.9	15025.3	20683.4	18604.9	35770.9	55580.6
16344.6	13916.1	22630.3	19292.9	34608	96477.4
29604.1	14565.7	21300.8	25227.9	23496.4	53056.1
23208.5	15086.4	15733	26406.2	31275.6	47420.2
17358.4	15133.8	15986.9	29495.6	33146.3	53392.1
24058.4	13108	20092.5	28614.6	27976	43360.2
15210.5	14916.5	12810.7	39918.9	23701.5	35924.7
18365.1	12946.6	13006.4	22118.9	24399.8	79121.2
13107.3	13113.9	12533	27046.7	22015.3	51034.7
14974.3	13846.5	13713.9	23051.8	26272.9	33671.9
22866.7	13958.6	17986	44413.7	31493.6	34388
22746.4	16794.4	20376.1	31235.1	31957.4	29437
16639.5	13735.5	11696.7	33940.4	24301.3	77144.3
19164.8	15349.8	12274.7	21738.4	28681.1	36651
21042.6	13649	18743.8	28374.5	32223	27574.9
18535.2	17483.2	15839.9	38970.1	18280.5	21652.1
18036.9	15026	17521.3	33934.1	26815.6	38700.5
14932.2	12937.5	12835.4	23599.2	23529.4	48960.5
34003.9	13891.8	16764.6	26970.1	30980.6	24769.6
19196.8	13241	13512.8	32931.4	37098	59183.6
23920.2	13568.4	22158.8	37518.4	19836.9	21074.3
17588.2	13405.9	17699.6	51058	24223.6	39547.9
29394.9	12947.3	18640.9	46585.3	20410.6	18741.5
22473.9	13110.5	20991.5	29853.9	26452.4	20763
20720.1	12986.8	21634.6	54894.6	19891.4	37827.8
19128.4	15158.8	17519.9	22651.8	25965.2	21688
15497.9	13800.2	11448.9	15478.8	23082.5	15028.9
19050	12852.3	28058.2	20862	29461.5	14912
17167.8	14274.3	15553.3	24315.5	31490.8	58434.5
16795.5	12977.7	22158.3	18820.4	27694.7	46365.1
28945.3	13718.9	26700.8	17399	19614.1	65771.7
20064.8	13493.9	21592.3	26705.3	30449.6	49619.1
25298.1	12706.2	17182.6	36262.8	20555.3	15913.7
18104.4	13057	26343.1	37469	24643.6	18738.8
18125.1	13149.5	19208.8	26228.2	28102.2	41119.4
15191.8	13605	16113.9	27734	23341.5	20505.6
36572.3	12550.9	16632.2	14622.5	21344	17697.6
13854.2	13092.5	15853.8	24334.4	20820.5	21414.7
26598.7	12499	24219.7	24092.7	24477.8	31314
15801.3	12302.6	22251.2	25962.4	23707.8	29407.6
18273.8	12340.4	16959.1	17668.4	83849.4	19407.6
23058	13583.8	15629.7	14440.1	32692	22555.9
22252.8	12745	18520.7	23910.6	29540	20481.8
27642.8	13504.7	21113.6	22935.8	20301.3	21195.8
21321.6	11939.8	23727.5	20321.1	21150.5	26702
40958	12203.9	16985.9	23210.9	25535.8	20407.7
24440.5	13969.1	21725.2	25293.9	31233.5	13978.6
16808.8	13734	21141	17870.6	21871.2	38350.9
14458.6	13262.8	17112.8	17850.1	23674.5	21079.5
20438.5	13291.8	21903.2	16656.4	36219.8	19836.7
16727.5	16033.7	21367	50071.6	19593.3	45916.9
25227.4	12431.2	21187.9	36322.5	20993.9	18719.6
26678.3	14495.8	21230.3	20742.4	24850.9	28649.4
20103.6	12812.6	15031.2	36577.8	26572.1	23441.8
17498.9	14001.2	19805.7	22357.5	24787.5	35883
17768.4	13245.5	22873.4	23615.6	24941.1	27670.9
18395.6	12950.1	21680.8	52866	24123.5	30285.6
15653.9	16476.6	19980.3	25837.6	22742.5	27984.5
23063.8	13022.4	19074.4	59426.9	26566.3	23619.1
23367	15196	26059.9	52597.5	33973.2	59683.5
19340.5	13755.7	20586.5	16092.9	29321.6	58003
26440.8	15545.4	24706.3	38098.4	22065	48505.3
20613.9	13603.5	24891	56132.6	67328.9	64414.2
22204	13235.5	25173.1	51927.9	93642.7	18801.2
16776.7	14688.8	22465.9	20933.1	66409.7	25169
17173.3	12315	22567.6	52175.6	70121.3	23026.6
18547	11591.8	23249.4	20715.2	56921	28743.2
13766	13026.7	14765.8	69502.1	77420.5	53754.6
16643.3	13016.2	22205.6	86869.9	67512.6	29364.1
24876.6	13054.2	22410.7	44995	58281.8	21850.8
17389.7	13324.5	21600.6	26599.6	57591.3	22106.6
15236.8	13962.5	15991.6	17192.3	56844.6	18414.2
19056	13399.5	24502.8	65160.4	48962.7	43237
13595.8	13614	20810.5	71732.9	115721	20970
21873	14626	15590.7	15941.3	81155.8	45158.3
17021.2	14021.3	21036.6	53854.1	48661.5	31932.5
18985.3	12280.1	18727	60161.9	64275.3	16588
15958.8	14137.3	25630.9	44485.2	37930.1	20855.7
20839.4	14199.5	19644	28693.8	44319.5	24475.2
26434.2	13999.2	23259.4	45725.5	93848.1	24994.3
22888.2	12456.6	15673.8	25659.8	54861.8	22560.1
15068.6	13577.4	17948.1	49984	48844.6	16858.2
24162.6	13103.5	18103.5	20949.8	31409.8	14260.6
21992.2	22470	23741.8	68462.5	72817.1	16682
14929.2	27603.2	21515.4	16441.6	54969.4	19002.7
12941.9	33268.2	16630.1	40899.1	52744.6	27193.4
22474.5	32169.5	17264.6	53586.9	43518.4	18571.3
17375.7	35286.7	21552.2	23140.5	52979.2	14341.1
15754.9	30770.9	20907.6	16612	33278	19366.5
13232.3	23218.1	16721.3	51012	47785.9	23325.2
20574.7	25758.1	20928.2	31805.6	57247.2	17230.1
12877.9	36748.3	19991.4	16706.1	64428.3	15752.2
24525.5	29008.9	14338.1	58397.3	42110.6	19032.3
20135.9	31652	21917.6	81211.1	44731.4	22450.6
20990.3	39883.6	23259.1	27739.8	34510.6	16043.8
18355.5	18499.4	21702	30448.6	44063.3	17983.5
13773.9	37884.4	17113.7	25545.5	70209.9	16000.2
14357.2	29907.8	28177.1	25859.3	85008	13789.9
22122	20762	23799.3	37753.5	44994.9	17890.6
20320.7	26211.2	19009.8	29123.2	55477.9	18305.2
13728.7	35320.6	21709	27843.1	47098.3	15850.4
19024.7	24581.3	25812.8	16825.8	49247.1	16753.8
23047.7	26138.6	20160.9	24920.1	51722.3	24368.7
20801.1	22452.3	23847.3	35184.5	40324.7	15612.2
20905.8	21231.1	19840.9	33342.3	33091.2	16550.7
18232.1	30432.8	20413	24409.2	65332.5	15107.1
23401.8	25039.3	20647.8	22259.1	74961	13178.6
18824.1	25991.4	20099.6	24294.4	28593.5	17782.2
22755.8	23353.6	29905	29562.7	30759.3	24753.2
26242.3	34009.3	29024.9	20266.5	54120.6	26156.6
26997.9	20598.6	27169.2	23453.8	31407.9	16210.5
20663	34917.1	18331.6	21261.8	55740.7	14551.8
20265.5	18157.5	32552	101919	78874.5	20051.8
15890	15081.8	30356.6	75097.7	44916.1	78941.4
18169.3	15574	19623.9	85229.4	61431	22578.3
14786.2	14087.8	17373.9	53506.7	62417.8	23063
15333.4	15748	19084.9	24044.9	27993.1	13043.6
22766.2	17335.8	25644.4	62101.4	46680.5	14093
15793	15232.5	19437	73380.4	64132.6	16715.8
20482.7	14106.4	18585.4	79793.9	76498.8	33893
21779.7	16941.2	19215.5	29428.8	54477.9	18803.1
18995.9	15315	17555.5	47749.8	40465.6	17700.5
19254.4	15327.6	22200.1	75572.4	40057.3	17773.8
15473	15423.1	17093.9	70849	41188.5	16016.7
20786.8	16259.8	19759.8	76512.7	49459.7	21857.7
19677.8	12532.7	25157	87786.8	53758.2	28136
16363.9	17748.5	23908	111298	52474.2	18133.3
18948.2	14543.8	20493.8	54783.9	49206.1	19700
15147	14735.1	32457.5	103369	51511.5	18755.9
19826.5	12131.7	23692.1	135652	34283.3	19942.2
24450.1	15909	17735.5	104260	62654.5	28363.7
16023.6	14166.6	33576.7	69236.4	45554.8	25155.8
18144.4	13741.6	27458.3	91851.7	38436.3	18156.4
20855	13629.3	30930.1	51343.8	43637	19963
20613.2	18684.6	23043.2	71318.4	35506	48830.2
17008	12169.5	22366.5	32294.6	45566.6	18773.9
17700.9	16229.4	22755.1	34906.3	59640.9	14719.1
22049	14657	24462.5	89526.8	30387.8	28332.6
16950.8	16051.2	20764.3	64726.5	59252.8	21817
19705.5	15436.3	21183.8	39392	47977	16149.7
16751.1	13375.6	30569.1	63278.3	60316.7	20376.2
15980.9	13428.1	18746.3	44923.7	43562.6	90046.9
17224.8	12548.4	20292	22524.2	59410.3	27609.5
21155.6	14872.7	16974.6	23315.6	43092.9	22851.1
28737.9	13602.9	26462.5	72317.4	65789.9	54025.9
17214.1	14584.1	25083.5	85649.5	37928.7	77603.4
14195.1	17888.1	22386.3	45558.1	62369.7	49627.8
18398.7	16010.9	21068	142921	51688.4	62790.2
22041.4	15873.2	17035.8	100123	80820.2	100912
14701.5	15714.4	23870.3	47219	62988	50091.9
20998.6	14492.2	31366.7	42277.7	69641.6	49679.4
20677.1	14863.6	28631.3	58205.2	67767.6	36720.4
17575.7	15837.7	29175.5	80212.5	56197.7	42200.7
15485.3	14456.8	24184.6	65210.9	30768.4	25489.1
18239.7	13788.1	24893.7	46740	66696.5	81421.2
16204.9	15259	20228.6	61792.4	103859	35533
18902.2	14728.3	18008.1	73947	45993.9	90356
17397	13317.5	21139.8	45956.4	50591	30688.4
19140.9	11259.1	17506.2	42499.1	35681.9	15463.4
17466.2	11894.2	35147.7	125239	60849.7	36432.2
19029.6	12345.1	22366.4	60562	42047.5	20075.2
26443.1	11825.5	28429.6	121203	33444	61527.4
19083.3	11299.8	22240.2	92784.7	83658.7	39457
18969.9	11778.8	18918.1	50408.9	40078.4	78960.9
23907.9	11630.7	23967.3	72610.4	63670.3	34459.6
18653.3	11192	23810.7	108751	69359.1	51277.3
16599.8	12823.1	19849.1	57473.9	72212.7	65732.7
25725.9	12070	33030.9	52081.8	42060.3	56413.2
20870.7	11527	20789.5	109306	34734.3	18539.6
15810.4	13551.6	22502.5	81704.6	44540.3	98879.4
20938.9	12146.9	21849.3	44483.5	39372.2	133107
20425.7	12806.9	20940.3	54145.2	34491.3	25399.2
20174.4	11392.9	15896.9	63565.3	49772	42208.2
21298.1	11124.3	28882.9	61533.1	60991.2	29773
28048.7	11800.7	18068.9	43764	90335.8	32609.6
13511.6	12501.2	18115.5	32375.5	85172.2	79042.4
21987.6	11343.3	34511.6	94463.9	44450.9	58115.1
25122.8	11165.1	21093.6	106039	38733.6	76061.7
23009.2	10990.5	39896.4	51439.3	66653.3	54586.4
17141.7	11389.1	18793.5	26248.7	53799.9	90213.2
14530.7	11507.7	25146	31610	57285.6	97938.7
23405.7	14802.7	21876	47856.1	53209.3	49901.4
19325.1	12423.3	16278.8	41265.6	55330.5	48933.8
17895.6	11973.6	23109.1	24551.2	47437.6	39445.4
15424.6	11883.8	16758.5	28216.5	36164.2	42344.1
18265.4	12528.5	23915.9	61709.4	37330.8	77015.9
19595.7	11420.2	26970.5	81876.9	49079.5	39420.8
23679.5	12150.3	18106.7	47469.1	57221.3	118487
18303.6	11634.3	28992.4	60583.9	45565	28296.5
14235.3	11629.9	22476.3	49619	47958.9	34652.9
20278.3	12929.2	23936.8	41497.9	55194.4	30353.3
22968.7	12264.1	19285.4	19202	28145.6	72986.2
23197	12254.8	27829.4	46803	27833.5	44374.2
14982.9	12007.7	25206.7	42332.9	48653.9	24843
13412.6	12088.9	26039.2	65128.8	47933.7	76927.1
23810.5	12718.9	30052.7	18252.3	54126	57729.5
32753.3	12776.5	18071.5	86491.4	45024.3	86045.7
30404.4	12948.6	23052.9	93518.7	38597.7	29981.9
28036.5	12489.8	19823.2	72838.5	46661	56758.8
25349.8	11368.2	27371.9	48587.2	32189.5	29735
25242.3	12334.2	28816.8	62876.6	21014.4	35946.6
33012.3	13697	16129.4	70213.2	42651.2	46606.2
31467.8	13244.6	22923.8	67930	36041.4	71312.1
28524.1	12919.9	21656.1	28834.5	48211.9	43825.1
27579	13231.7	33919.4	70487.6	38741.4	34128.7
21347.6	11319.2	25618.1	80714.4	36097.5	21960.6
29935.7	12200.7	27966.6	125557	71056.4	19763.2
34243.5	12504	22660.7	73954.9	64355.7	18815.2
33502.3	13384	19862.9	27144.4	53347.9	39685.5
23998.8	12048.1	21651.1	112681	74150	24500.7
42949.5	10960	27159.1	55195.4	66654.1	72483.7
22904.1	11176.6	25715.4	24738.6	29801.2	22347.7
22363.3	11981.5	18310.9	112086	60051.3	65523.2
31272	11393	34570.9	88450.6	50601.5	22549.6
21969.1	11527.9	24255.4	61118.9	76418.6	18558.2
33132.5	11573.2	19297.2	58961	69937	23968
23539.5	13271.8	25381.4	81740	31459.6	55421.4
20655.3	11680	21010.6	87469.2	35062.8	84169.3
34604.8	13161.7	19240.1	35461.1	50143.4	26125.3
29573.8	12496.8	14393	64763.1	63322	38918.6
13114.1	11866	14074.5	73418	29386.5	26580
13375.3	12389	13022.7	23300.1	48457.9	54642.4
14748.4	11755.4	15526.6	85233.5	39815.8	71873
23978.7	11323	19693.3	26918.4	33945.8	72505.3
11973.5	11392.8	20445.7	22694.3	64500.7	18368.8
23178.3	11522.9	22427.1	40806.3	31930.3	78197.4
39112.8	11291.6	23806.2	26008.2	40877	35473.1
17005.8	11210.9	22674.9	26043.6	24004.4	62345.9
34845	12112.8	17498.9	31641.3	42029.4	23928.1
22946.5	12266	22338.8	17939.9	75892.1	64310.2
14128.8	11956.9	23988.8	23723.5	46673.9	59938.8
17630.7	14754.3	27451.9	24025.2	54142.6	64848.7
22892	13369	17706.7	16791.5	34687	54943
22841.1	13655.8	19487.3	17391.6	48650.5	24015.5
12321.8	11325.7	16621.6	25652.1	30973.6	62585.1
18195.6	11379.9	20139.5	26904.4	45947.3	50337.6
32445.7	14061.5	27841.2	24636.1	43022.4	71974.1
14974.6	13424	21779.9	22869	40816.4	58260.9
20953.9	13387.5	19772.1	22696.5	21837.8	42483.1
19998.4	13239.4	19872.2	33963.2	27822.9	35665.2
20910.3	13538.4	18688.4	24801.6	39703.3	82052.2
22997.4	13296	15281.8	28007.6	28450.6	90317.3
14668.1	12634.2	14937	29208.7	27788	42216.3
18544.8	13592.9	19570.5	19877.2	42158.2	70346.4
15098.6	13374.2	17833.7	19973.4	34336.4	24597.6
28832.7	15241	25919.1	22525.6	32390.2	54437.3
36065.9	13085.9	17953.7	21455.5	54257.5	17668.5
14135	15021	20841.3	22659.2	53201	28187.2
14657.4	12204	20004.7	25260.7	31781.7	53985.2
17951.2	12699.3	24407.4	20109.5	37873.9	56570.1
13830.9	14953.8	17078.2	19664.4	46142.2	39472.2
15787.6	12971.1	19209.2	18716.3	23308.1	82117.8
22778.4	12045.2	19894.8	22699	54662.5	21323.7
12833.9	15527.9	25843.7	25350.9	50494.8	56729.9
25229.6	11149	18771.4	17262.6	39495.4	38752.8
16531.2	12438.4	19556.5	21505.6	48546.9	29803.9
16362.4	12090.4	29650.5	17805.2	57691.8	55289.2
14237.4	17394.2	25638.2	18360.8	46123.5	38450
30932.8	13084.3	19683.4	29941.4	52441.9	30910.2
23873.8	12965.5	27715.7	25182.5	30336.1	42657.3
11976.2	11843.7	18911.9	28931.8	46382.9	19247.7
30583.7	11153.5	23089.2	25858.1	44094.3	64340.9
19221.1	14344.7	24365.7	19293.5	30808.1	28208.3
23027.5	12875.2	22969.3	27917.7	23776.5	67427.9
14802.4	12735.2	15918.7	32646.8	38929.6	19293
21978.8	13605.2	22773.5	59443.1	41700.2	12990.5
19272.7	13762.2	19660.8	35269	30356.6	29316.2
21534.5	12105.3	41067.5	23789.8	43418.8	18291.1
16578.6	12690.9	16402.2	26292.2	48980.2	39222.7
22726	11249.1	19400.6	39838.4	40940.7	37275.7
21457.6	12681.6	19870.1	29978.4	18687	15459.8
23833.7	11162.5	19586.3	33309.2	38020.7	13215.2
39722.3	12413.9	21979.7	27734.3	27637.3	13419.7
27255.9	12292	25620.6	26645.6	49204.2	13245.1
14378.7	11254.1	28068.9	24460.2	45803.1	18712.9
20968.8	12204.2	25052.8	19667.1	43942.1	21901.3
22008.8	11723.6	24565.5	34790	73397.7	15629.2
30148	13654.7	23862	21418.5	50383.4	15172.8
15870.9	13764.1	23102.3	32978.8	59667.9	15022.3
24030.7	11086.7	20656.7	38618.2	28956.4	13972.9
26713	11736.7	14695.1	20462.5	40454.8	12535.5
36436.6	11064.3	18355.9	21051.3	41884.6	20022.5
26273.8	11504.3	17874.2	40620.9	50827.3	16053.5
27674.1	11910.8	29050.5	22536.1	57415.4	14353.5
24356.2	11546.9	19330.4	19387.7	74517.9	14948.1
28776.9	14489.8	25669.4	20949.2	53540.2
34099.2	12259.1	29384.8	24231	37258.9
26078.2	11314.5	18861.2	22511.7	79331.1
19169.7	11920.2	26472.9	19922.4	39344.6
29872.9	12059.4	13449.3	18801	42210.7
20683.8	11455.3	18918.9	20375.3	35541.7
13512.4	12916.2	20686.2	34646.5	40166.9
21709.4	12282.3	15741.1	21863.3	58505.6
15629.9	11815.7	32557.6	24073.3	33157.7
13971.8	12560.5	30330.4	24044.1	44540.8
12096.2	12225.9	16742.1	19636	49204.8
16081.2	11826.2	20130.3	18639.9	57739.1
38575.9	11278.3	16576.3	21363.2	38062.3
14939	12652.3	11224.3	36307.9	33017
16831.6	13408.4	28542	20894.3	44682.5
18134.1	12215.3	18398.3	28179.1	34649.1
20448.5	12968.1	22489.8	34556.6	63699
13172.3	14837.4	20343	20504	50284.1
16452.5	12376	17353.3	29400.2	34418.8
13204.9	14170.3	18538.3	32118.9	92157.1
18794.4	15534.9	18835.4	25918.3	42852.2
20475	20867.3	16467.2	28869.9	43373.6
23523.8	21105.8	29828	37251.7	44753.5
48062.4	18132.7	28457.2	24430.7	46039.3
13980	20617.3	20303.9	24467.1	53516.4
14017	14433.8	23635.9	21358.6	53841.4
32827.1	22164.3	28068.9	31338.8	51207.2
31673.5	23194.4	23553.6	24469.4	73496.9
35964.1	18096.1	33458.5	20890.1	45611
18522.7	18022.2	17154.1	18607.9	38254
43856.2	17576.1	20131.5	15354.3	44148.9
35782.8	24415.7	21215.3	16256.9	50348.6
34234.8	30928.6	20921.3	24617.7	55426.6
18902.1	18678.4	20592.2	33420.7	52463.4
28914.1	13090.6	26414.6	32231.7	38442.4
28382.4	16121.6	18365	24428.1	53495.6
20576.7	18459	26152.7	23832.9	54207.8
16402	16464.4	19772.7	30078.5	168984
42446.4	14227.3	21324.2	23337.9	47097.2
17479.3	24813.8	20390.9	28816.9	52834.8
27769	19827.1	22397.4	26847.2	56031.9
31861.8	15034.8	21580.9	26974.2	54983.6
27324.5	20037.6	24371	31901.7	48093.5
16075.6	16382.7	17464.7	30120.3	50677.7
57113.4	19068.2	21031.2	29348.7	64499.5
34513.2	19917.1	20626	33799.8	38076.1
29420.9	29067.9	21860.3	26539.9	59330.4
19971.9	26684.9	15501.4	22197.5	42764
48317.1	20492.7	17511.6	22649.5	46052.5
28358.9	18705.4	16670.2	21797.3	47438.4
44317.7	18850.3	31544.6	25101.2	64001
21818.3	16162.9	17374.2	20792.6	45729.5
34949.2	27452.2	21137	35156.4	51135.9
40057	21847.7	13691.5	21109.9	42031.5
44340.3	27021.7	17592.5	40516.2	47461.5
34891.8	20685.3	20143.5	24249	46005.8
44905.2	12338.3	20667.4	25688.3	32916.4
24344.9	23158.6	19080.1	29514	91034.6
30449.6	25206.5	16658.9	50610.9	51434.6
32439	20322.5	18993.5	41093.9	48034.8
27041.1	21077.3	17427.1	29239.1	47097.1
34790.8	20716	24502.3	27046	29006.7
37176.4	21108.4	21135.6	37130.6	54599.4
26651.1	19814.9	20181.5	25090.5	58662.4
42653.4	18857.3	17277.4	29639.9	83142
34561.2	16335.1	12363.5	36922.9	69157.7
25386.3	17589.6	18230.9	37927.2	47052.5
31249.4	17630.6	19566	32595.2	55015.8
28298	14621.4	20085.1	43043.3	37348.7
16362.1	18483.4	22187.2	40856.2	85026.3
40623.2	19574.4	19481	23495.6	78506.7
21792.1	16511.5	23466.4	39240.2	68931
17353.4	18404.7	24227.3	36980.4	93655.3
15673.3	16418.6	21161.5	20282.2	80289.5
18569.3	20541.1	16726.5	25292.5	45785.5
17713.9	15406.6	27398.2	28315	102624
18709.4	14479.2	17680.7	19623.5	42130.9
14090.7	15388.5	21402	38686.5	110796
13187.3	12175.4	21673.6	28253	146302
18080.3	14003.5	18094.5	30334	57493.9
13118.9	15102.7	22268.8	26664.3	79199
12742.3	14551.7	17844	42374.8	34512.6
41129.8	13087.3	14163.3	29458.5	36460.5
15730.7	14083.2	25100.7	36319.6	66914.6
12086.7	15290.6	17109.4	28994.7	27775
34182.2	16182.8	13482.7	23531.2	59169
14315.7	15988.7	19463.4	32055.9	56601.2
28775.5	12093.1	16536.3	30797.9	64046.4
13180.6	16683.3	17208.2	26746	42911.5
14397.3	15881.9	17878.7	38323.7	46250.2
13951.1	15739.8	18573.7	27050.9	34262.9
27668.6	12809.1	14321.8	25779.2	33418.4
29004.1	15096.9	18548.4	31304.5	59950.2
15577.2	14186	23946.8	21337.7	58918.2
23093.1	13092.4	21353.5	18018.3	66696.5
23409.2	11845.4	15660.3	34355.1	31795.7
18134.4	12889.8	18301.6	17138.9	85720.4
43386.6	11402.2	20014.7	35342.2	42112.8
33105.8	14232.8	16304.7	33403.1	50649
26733.9	12368.7	20441.9	35508.3	35644.4
15544.2	12151.4	14998.6	18408.1	28442.3
35596.2	13373.4	24677.3	34974.9	47561.7
24780.4	12176.9	19012.6	38751.9	71299.6
14348.9	11381.3	20254.9	31282	38399.2
34182.2	12843	20141.4	23658.6	38943.5
28275.6	12939.5	22218.1	28229.3	48488.8
12232.4	13296	16449.4	38231.5	54547.4
16654.9	12189.6	15842.8	27581.5	64591.8
26882.2	15723.9	20945.6	33681.4	37136.4
15233.6	15375.9	17578.9	31619.5	64152.3
21357.7	21280	21444.4	20846.3	48489.9
31772.6	14725.9	17614	40003.2	69861.7
13703.5	14882.2	17489.6	23957.4	56076
12808.8	18004.2	23241.3	28218.2	110676
29430.3	15540.9	20187.2	16344	66256.1
34210.8	17420.9	28650.9	30497.3	38125.5
36939.1	14186	18370.6	21900.9	33492.6
44471	13488.9	28316.9	21492.8	31427.7
44616.3	20241	22563	40305.9	43838.6
47534.3	16051.1	19165.2	27525.6	53000.1
32019.7	14620.8	18253.9	43119.1	25258.7
42231.6	15002.4	15481.1	20869.9	57564.1
48604.3	17883.6	23250.4	43657.4	71954.5
33609.5	15636.6	17310.8	28819.1	59142.5
36260.4	17925.3	17105.9	38859.6	68932.4
15784.1	23724.3	25809.2	28673.9	74704.5
23738	18971.4	21035.7	30875.8	52813.3
19070.9	16100.5	18620.3	36898.9	24477.1
23746.8	16380.9	24704	31002.9	23731.2
19266.4	13069.2	18382	45754.1	63218.4
54856.9	19344.9	13026.7	44549.6	64767.8
40326.6	12316.2	18498.9	40942.4	46718.1
44744.6	19707.5	20330.6	40864.5	58790
45302.7	15788.9	25448.4	34273	41851.1
55271.3	13968.3	18339	32645.1	44194.9
50190.1	15353.9	23857.3	37845.5	34620.4
60483.8	14540	30203.6	24504.7	38059.1
32633	15113.8	18191.8	18139.5	58040.4
26427.1	14742.6	16689.1	28063.9	59113.5
35630.3	16725.3	16796.1	33366.6	50599.1
38504	14709.2	24557.7	27457.5	51254.7
21487	16070.1	17443.2	25072.9	20869.8
43353.7	18028.2	20608	28804.2	41944.6
52310.6	15005.3	24943.2	32841.4	72589.4
62338.9	15442.1	16303.8	26430.1	61314.5
26741.8	21824.7	18741.5	33706.9	49539.8
34604.1	13330	15978.9	38451.1	49539.8
23644.5	18303.1	17952	38553.8	101270
42425.4	13160.8	18481.6	34681.1	58627
30033.2	15744.9	21946.9	46248.4	62365.9
60421.1	19542.3	22641.3	25237.4	80498
55374.5	23561.5	19024.8	37737.5	73617.5
19945.6	17167.4	23486.8	31463.9	75280
13913.5	13417.4	20011.3	38110.8	57669
15603.8	20301.6	14051.2	40031.3	99852.8
16258	26392.8	23145.8	24496.3	93611.6
14521.5	18771	19861.7	39825.9	24291.2
13743.7	19897.3	22722.4	34465.9	58709.1
12008.1	17173.8	21062.5	40423	39427.8
12354.7	19017.7	18996.3	26109.8	40977.6
15794.6	16874.1	20904	34583.9	29574.6
12990.7	16018.5	20739.3	45085.2	56529.8
14959.6	19946.1	19279.2	29735.7	58839.9
15749.7	17555.7	16083.3	38687.6	26287.8
12320.9	18721.7	19718.4	31843.4	79239.1
16234.6	22452.1	21618.7	34589.9	63129
14346.6	25023.4	19992.8	31408.9	22951
13016.8	21042.8	16866.7	28529.6	23029.2
12495.1	29095.5	23579.2	28336	35872.3
16149.6	19389.4	19427.1	35471.8	24326.5
23625.7	20494.2	22152.5	35962.7	25938.1
22844.1	18969.3	19009	39348.8	56596.9
18327.7	22106	21324.8	51202	25599.1
19794.3	20202.9	22116.4	37171.6	24082.8
19715.8	17283.2	23866.8	37358.1	20409.6
15902	18330	17749.5	41232.8	54912.8
15867.6	24537	20194.3	39262.9	33226.9
20790.4	18305.7	19180.1	25251.6	28615.5
15617.9	31026.5	24217.3	17517.2	28803
21184.5	22624.1	23591.9	34700.1	23823.6
12138.4	23389.4	34607.4	25114.9	29439
15225.7	23858.8	18319.1	40557.6	66690.9
18881.4	18934.6	22958.8	22980.7	62916.9
13883.8	16401.7	19493.3	27966.4	42884.6
17132.2	22577	16062.5	31601.1	33777.2
15644.5	16407.6	22251	31182.1	44152.3
15390.1	20400.8	17607.6	22329.1	24953.4
53532.8	19810.3	23705.7	32821.3	72416
35225.6	14383.1	13024.2	23704.1	48253.8
40052.3	14960.7	13303.5	35531.6	65391.3
48953.3	15833.6	24544.7	20178.1	41214.4
46242.2	13875.9	19757	22748.3	42662.5
28529.9	11843.8	18061	40465.3	40181.2
30950	15352.2	29276.2	21472.7	57272.7
34695.7	13289	24572.8	33850.4	30441.4
38356	15022.4	19696.9	39135.6	31904.4
19911.1	13579.7	21003.6	28438.5	41404.7
40224.2	17555.4	29176.3	26373.1	39085.3
43627.5	16870.6	21579.2	15610.1	32427.7
41210.2	12615.6	29566.2	31436.7	25377.8
27706.2	11974.1	15682.7	28514.8	30590.8
40462.5	12301.9	26861.9	26821.7	34033.9
21963.9	14112.4	27890.3	20687.6	51309.2
27422	15001.1	18613.6	23764.2	49902.5
50282.3	16192.1	16040.6	26107.2	37517.5
32797.4	15980.1	18826.7	28658.7	53400.2
37350.4	21576.3	26024.2	26715.2	59509.5
49324.7	15900.8	23828.2	23025.1	39717.4
29926.1	16804.6	19177.3	28823.7	43286.4
26798.9	15962.1	17025.4	21483	45333.4
21817.4	16974.8	26238.3	26616.1	41432.1
33899.6	17642.1	19316.9	26821	47858.6
39812.5	17513.6	26776.9	30230.9	44890
35743.5	16213	23067.8	20710.8	82338.5
26274.7	16347.6	25211.4	23755.1	40047.3
21526.3	14492.1	20012.2	27538.9	34364.6
48267.9	13974.4	17214.4	23618	61320.7
30797.5	16412.7	24016.3	28276.5	41298.4
25612	11874.3	22361.3	29920.2	27797.6
25066	19689.5	17978.9	19390.6	76652.6
33930	15507.8	23235.1	33098.4	17461.1
21426.2	12222.7	26355.5	21962.3	49221
42221.5	23182.4	18240	29918.8	45265.4
27954.9	25582.4	17470.1	28196.9	53372.1
32898.6	24543.8	17822.4	34572.1	76569.9
30104.5	22702.4	24380.4	20128.5	39247.8
24513.5	22932.5	21657.1	29314.5	76519.1
36146.4	20341.4	25472.9	27410.5	26278.9
37611.2	19257	20839.1	33717.3	31356.9
31662.5	28428.5	26721.2	19802.6	36267
64716.6	26122.7	22726.7	37631.7	73600.4
38637.8	25009	18388.2	31392	37074.4
61904.2	27631.9	18627.5	20758.1	53751.3
44723.5	16349.8	23719.2	40754.4	28800.9
31542.8	14842.6	21058.9	25040.2	69188.5
46949.2	12649.6	22221.4	23317.8	63652.3
57285.9	22765.7	23554.5	30575.6	60565.2
53228.6	20068.3	20160.7	29547.6	90596.1
63727.1	27785.2	21696.3	34825.6	64266.9
25820.4	18834.4	30361.2	29955.6	50118.9
40813.2	19577	28538.9	41814.1	91366.5
51118.1	17607.4	29881.3	24383.1	54137.7
36660.3	16925.4	22427.1	25193.7	28909.8
25698.6	14927.9	24554.6	43770.3	50124.4
46237.8	15795.8	26319.2	20602.3	34530.4
40773.6	19781.3	25221.9	43027.8	28508
50729.5	15998.7	24751.2	30194.2	50848.4
27987.8	18913.2	22331.9	33880.7	48327.5
31424.7	16412.6	23440.6	26658.5	64514.6
54147.9	15312.1	22861.1	27371.3	17921.7
52153.3	19203.3	20391	41966.8	16746
42630.5	17631.8	27669.4	31056.3	48929.9
39286.3	15975.1	15646.9	40138	58577.1
39408.7	19712.5	14391.5	23160.6	18654.8
31595	17791.1	20717.4	32118.7	51513.4
49670.1	18987	23465.1	29902.7	25788.4
36038.4	16932.2	27194.5	45496.2	82167.2
60338.5	16242.8	20795.3	33372.5	75042.7
37800.9	19244.2	27966.7	40332.3	29948.5
32585.3	17473.6	18400.3	17816.5	58055
30285.3	16869.6	30012.3	16980.2	19724.8
47779.5	20262.3	21835.8	35349.8	55487.9
24074.9	15447.9	19470.8	36094.8	48682.5
30431.5	18579.8	21242.2	24707.8	20746.9
30409.5	23551.5	13817	40397.5	22980.2
20293.2	16538.4	27742.9	37123.8	30121.8
	21456.6	19855	27823.7	61117.2
	18228.6	19947	23996.6	39182.8
	16594	22100.6	24475.7	91087
	21594.9	18584.1	28734.4	28052.5
	17391.4	28857.5	29157.4	32971.8
	16996.9	21543.8	22995.2	56860.5
	21888.3	28432	27603.2	43164.1
	16393.7	20737.4	22531.8	52499.8
	20813.3	26781.1	21096.7	57745.1
	16551.1	23589.1	29666.5	66316.4
	17737.9	22434.2	22490.5	65273
	17938.2	21002.8	21427.5	67824.2
	17776.2	23457.7	37413.1	34816.3
	21508.7	34283.6	28707.7	31502.4
	16746.9	16050	22792.9	59901.9
	24608.3	32371.3	24299.5	41779.5
	17541.2	20282.3	29742.8	48285.2
	16714.5	17301.9	28900.7	75261.7
	16617.5	21156.4	26212.3	26563
	14816.5	33149	27753.8	32710.4
	20532.2	23622.4	19022.2	52953.2
	18738.1	16999.7	19207.7	53677.8
	19606.1	17855.6	29181.2
	16836.8	16201.9	19984.7
	22378.5	21133.8	21560.5
	24859.4	20699.6	62044.5
	21583.1	22815.1	51843.2
	15720.6	20473.6	50701.8
	18399.1	13369.4	45093.6
	15569	20920.6	84988.3
	13895.8	26659.1	49990.8
	14906.4	22042.4	93080
	15653.7	21341	56404.4
	16511.7	22916.5	34690.8
	16125.3	19233.5	47630
	19546	26713.2	52255.8
	19434.3	17515.1	41284.2
	16240.6	21788.7	66409.6
	19359	20962.2	65991.9
	14546.3	18216.9	46732.6
	19548.6	23618.7	66710.1
	14102.1	23644.1	82010.5
	16840.4	24216.4	69109.4
	18451.6	25560.9	62273
	15141.1	18225.1	106887
	15436	30338.6	65675
	15340.6	23878.7	69247.7
	17541.2	15100.1	92203.6
	17013.5	14194.5	67456
	15927.9	21120.3	85496.8
	12014.2	17662	64862
	14523.3	32946.6	40243.4
	23069.3	18356.8	48357.4
	12549		77254.1
	15594.3		55512.2
	14682		45730.2
	16650.5		52530.7
	16479.3		44941
	13149.3		81648.9
	16323.3		34349
	12077.7		91383.4
	13116.1		62683.6
	13304.3		47178.5
	12668.1		100569
	12584.4		57158.4
	16444.1		105579
	12820.9		27695.4
	13804.3		70021.6
	13695.6		40733
	13305.5		53960.5
	15196.7		77099.4
	16897.2		36829.5
	14053.8		44096.1
	19877.9		38173.3
	12273.8		29715.5
	21220.2		19619
	18240		17652.4
	15295.3		20205.7
	17672.1		56879.4
	18305.6		80800.3
	14586.8		41337
	17990.2		78658.9
	15032.7		25572
	16171		57320.8
	14884.4		23185.5
	14226.6		42990.7
	12985.6		44782.3
	13316.7		87841.1
	12719		38921.8
	19604.2		29723.1
	14819		42261.1
	15630.8		56776.9
	19602.3		22543.4
	17868.1		28015.4
	15281.3		24576.6
	18018.8		30561
	13608.6		76543.6
	14937.6		65289.7
	16041.6		51545.8
	13844.4		27861.5
	15816.4		77267.7
	16452.5		55144.2
	16982.3		55993.8
	15157		30889.2
	16607.5		29468.4
	18846.9		66833.1
	13606		46467.8
	17576.6		45759.8
	19499.5		42843.9
	14327.1		62922.8
	14949.4		22345.4
	18526.5		38726.1
	15813.9		24457.6
	15900.2		23606
	15454.2		57628.4
	13290.7		36820.2
	13596.2		24074.9
	18852.3		31744.5
	16805.5		46307.5
	15086.4		23572.8
	15600.2		27568.5
	15924.1		33373.1
	17246.6		51763.5
	14546.9		69578.3
	19223.4		45399.7
	16769		69245.2
	19128.3		71738.5
	24295.9		33298.3
	15831.7		51840.4
	23353.7		41895.6
	17783.1		40546.3
	15299.8		51303.2
	13369.2		66565
	16939.5		63619.5
	14320.4		90914.3
	17567.6		70721.3
	14909		95242.8
	19492.8		25774.2
	17666.4		85084.4
	20740.5		82797.5
	17793.4		78947.4
	21103.2		79318.2
	19850.9		55798.2
	23741.3		72502
	20076.3		64034.3
	16881.1		79138.9
	19927.5		67032.9
	22978.2		104905
	25594.4		29300.3
	27204.2		92298.9
	28115.9		71034.9
	24849.4		34102.6
	21436.6		63199.8
	23050.2		32675.5
	33545.8		50088
	24912		75634.2
	19452.5		94598
	19200.2		35498.5
	24168.7		50584.3
			55961.7
			43630.6
			42813.1
			86326.9
			70285.5
			74283.6
			52649.5
			58741.8
			56340.3
			55332.6
			49163.4
			55823.2
			53066.5
			70799.6
			61358.7
			58514.7
			56318.7
			81201.1
			76505.9
			90754.8
			18953
