# Supplementary material for: ACK1 and BRK non-receptor tyrosine kinase deficiencies are associated with familial systemic lupus and involved in efferocytosis
Source: eLife. 2024 Nov 21;13:RP96085. doi: 10.7554/eLife.96085 (PMC11581429; doi:10.7554/eLife.96085)
Supplement: Figure 4—source data 1. [file elife-96085-fig4-data1.xlsx]

## Sheet: Sheet1
Figure 4 - Source Data 1
Figure 4D: Immunoprecipitation (IP) kinase activity assay of WT and mutant ACK1 and BRK kinases in HEK293T cells in the presence of MERTK and/or GAS6
Plot values (left panel)								Statistics (left panel): p-values were calculated using an Ordinary one-way ANOVA (Tukey’s multiple comparisons test).
MERTK+GAS6 only	ACK1 WT	MERTK+WT ACK1	MERTK+GAS6+WT ACK1	MERTK+GAS6+A156T	MERTK+GAS6+K161Q			Comparisson	P Value
4.728	18.913	69.899	105.118	2.764	9.6			MERTK+GAS6 only vs. ACK1 WT	0.0812
3.688	18.582	83.393	102.221	2.972	6.166			MERTK+GAS6 only vs. MERTK+WT ACK1	<0.0001
								MERTK+GAS6 only vs. MERTK+GAS6+WT ACK1	<0.0001
								MERTK+GAS6 only vs. MERTK+GAS6+A156T	0.9992
								MERTK+GAS6 only vs. MERTK+GAS6+K161Q	0.9352
								ACK1 WT vs. MERTK+WT ACK1	<0.0001
								ACK1 WT vs. MERTK+GAS6+WT ACK1	<0.0001
								ACK1 WT vs. MERTK+GAS6+A156T	0.0571
								ACK1 WT vs. MERTK+GAS6+K161Q	0.2198
								MERTK+WT ACK1 vs. MERTK+GAS6+WT ACK1	0.0046
								MERTK+WT ACK1 vs. MERTK+GAS6+A156T	<0.0001
								MERTK+WT ACK1 vs. MERTK+GAS6+K161Q	<0.0001
								MERTK+GAS6+WT ACK1 vs. MERTK+GAS6+A156T	<0.0001
								MERTK+GAS6+WT ACK1 vs. MERTK+GAS6+K161Q	<0.0001
								MERTK+GAS6+A156T vs. MERTK+GAS6+K161Q	0.8155
Plot values (right panel)								Statistics (right panel): p-values were calculated using an Ordinary one-way ANOVA (Tukey’s multiple comparisons test).
MERTK+GAS6 only	BRK WT	MERTK+WT BRK	G257A	MERTK+GAS6+G257A	G321R	MERTK+GAS6+G321R		Comparisson	P Value
2.07965	19.115	29.3363	7.78761	13.1858	0.840708	0.176991		MERTK+GAS6 only vs. BRK WT	0.002
0.353982	12.5664	29.646	6.9469	16.0619	0.752212	1.9469		MERTK+GAS6 only vs. MERTK+WT BRK	<0.0001
								MERTK+GAS6 only vs. G257A	0.1542
								MERTK+GAS6 only vs. MERTK+GAS6+G257A	0.0033
								MERTK+GAS6 only vs. G321R	>0.9999
								MERTK+GAS6 only vs. MERTK+GAS6+G321R	>0.9999
								BRK WT vs. MERTK+WT BRK	0.003
								BRK WT vs. G257A	0.0398
								BRK WT vs. MERTK+GAS6+G257A	0.9948
								BRK WT vs. G321R	0.0016
								BRK WT vs. MERTK+GAS6+G321R	0.0018
								MERTK+WT BRK vs. G257A	0.0001
								MERTK+WT BRK vs. MERTK+GAS6+G257A	0.0018
								MERTK+WT BRK vs. G321R	<0.0001
								MERTK+WT BRK vs. MERTK+GAS6+G321R	<0.0001
								G257A vs. MERTK+GAS6+G257A	0.0803
								G257A vs. G321R	0.1203
								G257A vs. MERTK+GAS6+G321R	0.1408
								MERTK+GAS6+G257A vs. G321R	0.0027
								MERTK+GAS6+G257A vs. MERTK+GAS6+G321R	0.0031
								G321R vs. MERTK+GAS6+G321R	>0.9999
