# Supplementary material for: ACK1 and BRK non-receptor tyrosine kinase deficiencies are associated with familial systemic lupus and involved in efferocytosis
Source: eLife. 2024 Nov 21;13:RP96085. doi: 10.7554/eLife.96085 (PMC11581429; doi:10.7554/eLife.96085)
Supplement: Figure 4—source data 2. [file elife-96085-fig4-data2.xlsx]

## Sheet: Sheet1
Figure 4 - Source Data 2
Figure 4E: GSEA of control, inhibitor treated, and mutant iPSC derived macrophages in the presence or absence of apoptotic cells
GSEA of positive regulation acute inflammatory response
	WT Control vs Apop. Cells	+ AIM100	+ Cpd4f	ACK1 A156T/K161Q	BRK G257A/G321R
NES	2.03	1.54	1.85	1.74	2.2
q-value	0.0001	0.03	0.03	0.07	0.0001
p-value	0.0001	0.05	0.03	0.005	0.0001
GSEA of Go negative regulation of inflammatory response
	WT Control vs Apop. Cells	+ AIM100	+ Cpd4f	ACK1 A156T/K161Q vs Apop. Cells	BRK G257A/G321R
NES	1.59	0.94	-1.02	1.39	1.23
q-value	0.03	0.61	0.37	0.3	0.21
p-value	0.0001	0.52	0.6	0.052	0.15
GSEA of AKT UP
	Ctrl vs Apop. Cells	Ack1 inhib	BRK inhib	ACK1A156T/K161Q	BRKG257A/G321R
NES	1.45	-0.69	-1.12	-0.49	1
q-value	0.04	1	0.31	0.99	0.48
p-value	0.01	0.97	0.18	0.99	0.43
