# Supplementary material for: ACK1 and BRK non-receptor tyrosine kinase deficiencies are associated with familial systemic lupus and involved in efferocytosis
Source: eLife. 2024 Nov 21;13:RP96085. doi: 10.7554/eLife.96085 (PMC11581429; doi:10.7554/eLife.96085)
Supplement: Figure 4—source data 3. [file elife-96085-fig4-data3.xlsx]

## Sheet: Sheet1
Figure 4 - Source Data 3
Figure 4G: TNF mRNA production by WT AIM100 treated macrophages 4hrs after exposure to apoptotic cells
TNF mRNA (relative expression fold change in comparisson to cell not exposed to apoptotic cells)					Statistics: p-values were calculated using an Ordinary one-way ANOVA (Tukey’s multiple comparisons test).
WT iPSC-Macs	+ ACs	+ AIM100	+ ACs + AIM100		Comparisson	P Value
1.04321	0.26	1.02804	0.754825		WT iPSC-Macs vs. + ACs	<0.0001
0.817946	0.41	1	0.959744		WT iPSC-Macs vs. + AIM100	0.9876
1	0.25	0.92456	1.22341		WT iPSC-Macs vs. + ACs + AIM100	0.963
0.942646	0.471341	1	0.976754		+ ACs vs. + AIM100	<0.0001
1	0.473992	0.632028	0.709129		+ ACs vs. + ACs + AIM100	<0.0001
1.01074	0.537568	1.06965	0.956178		+ AIM100 vs. + ACs + AIM100	0.9987
