# Supplementary material for: ACK1 and BRK non-receptor tyrosine kinase deficiencies are associated with familial systemic lupus and involved in efferocytosis
Source: eLife. 2024 Nov 21;13:RP96085. doi: 10.7554/eLife.96085 (PMC11581429; doi:10.7554/eLife.96085)
Supplement: Figure 4—source data 4. [file elife-96085-fig4-data4.xlsx]

## Sheet: Sheet1
Figure 4H Source Data
TNF production by ELISA in Isogenic WT iPSC-Macrophages (pg/ml)					Statistics: p-value was calculated by Wilcoxon matched-pairs signed rank tests for data that is not normally distributed
Isogenic WT iPSC-Macs	+ ACs	+ LPS	+ LPS + ACs		Comparisson	P Value
0	0	245.458	64.4364		Isogenic WT iPSC-Macs + LPS vs + LPS + ACs	0.0078
0	0	281.761	177.567
0	0	300.181	183.293
0		358	214
0		358	238
0	0	495.5	270.5
0	0	508	373.5
0	0	582	388
TNF production by ELISA in ACK1(A156T; K161Q) iPSC-Macrophages (pg/ml)					Statistics: p-value was calculated by Wilcoxon matched-pairs signed rank tests for data that is not normally distributed
ACK1(A156T; K161Q) iPSC-Macs	+ ACs	+ LPS	+ LPS + ACs		Comparisson
0	0	246.369	226.368		ACK1(A156T; K161Q) iPSC-Macs + LPS vs + LPS + ACs	0.1875
0	0	254	292
0	0	261.444	304.55
0	0	325.207	334
0	0
0	0	624	770
TNF production by ELISA in BRK (G321R) iPSC-Macrophages (pg/ml)					Statistics: p-value was calculated by Wilcoxon matched-pairs signed rank tests for data that is not normally distributed
BRK (G321R) iPSC-Macs	+ ACs	+ LPS	+ LPS + ACs		Comparisson
33	0	205	238		BRK (G321R) + LPS vs + LPS + ACs	0.0625
6	0	212	246
17	0	290	300
0		344	416
0		399	563
0		405
