# Supplementary material for: ACK1 and BRK non-receptor tyrosine kinase deficiencies are associated with familial systemic lupus and involved in efferocytosis
Source: eLife. 2024 Nov 21;13:RP96085. doi: 10.7554/eLife.96085 (PMC11581429; doi:10.7554/eLife.96085)
Supplement: Figure 4—source data 5. [file elife-96085-fig4-data5.xlsx]

## Sheet: Sheet1
Figure 4 - Source Data 5
Figure 4I: IL1b protein production by WT and mutant iPSC-derived macrophages in the presence of LPS and/or apoptotic cells
IL1b production by ELISA in Isogenic WT and Mutant iPSC-Macrophages (pg/ml)							Statistics: p-values were calculated using an Ordinary one-way ANOVA (Tukey’s multiple comparisons test).
Isogenic WT + LPS	Isogenic WT + LPS + ACs	ACK1 (A156T; K161Q) + LPS	ACK1 (A156T; K161Q) + LPS + AC	BRK (G321R) + LPS	BRK (G321R) + LPS + ACs		Comparisson	P Value
10	3.91	8	10	8	10		Isogenic WT iPSC-Macs + LPS vs + LPS + ACs	0.0095
12.5	3.91	12	12	13	10		ACK1(A156T; K161Q) iPSC-Macs + LPS vs + LPS + ACs	>0.9999
12.75	4	16	14	16	11		BRK (G321R) + LPS vs + LPS + ACs	0.9444
14	4.75	18	20	16	14
15	8	24	21	18
16	10
16	12
20	14
27	19
