# Supplementary material for: ACK1 and BRK non-receptor tyrosine kinase deficiencies are associated with familial systemic lupus and involved in efferocytosis
Source: eLife. 2024 Nov 21;13:RP96085. doi: 10.7554/eLife.96085 (PMC11581429; doi:10.7554/eLife.96085)
Supplement: Figure 5—source data 1. [file elife-96085-fig5-data1.xlsx]

## Sheet: Sheet1
Figure 5 - Source Data 1
Figure 5B: Frustrated engulfment assays for actin remodeling quantification in response to PtdSer in WT and mutant iPSC-derived macrophages
Plot values (Actin Clearance Factor Fold Change)				Statistics: p-values were calculated using a Mann-Whitney test).
Isogenic WT	ACK1 A156T; K161Q	BRK G321R		Comparisson	P Value
0.667273	0.582772	0.546371		Isogenic WT vs. ACK1 A156T; K161Q	0.0136
1.54106	0.698866	0.614805		Isogenic WT vs. BRK G321R	0.0036
1.01008	0.620191	0.70158
1.87603	0.858146	0.345893
0.797387	0.681857	1.50621
1.57999	1.47335	0.537577
0.709289	0.964605	0.581576
0.923198	0.804383	0.898533
0.83415	1.16121	0.774036
0.9	0.535637	0.876328
0.830677	0.822506	0.655806
0.709659	0.562086	1.42699
0.511605	0.71201	0.498411
1.06475	0.594974	0.709313
0.85681	0.594986	0.595386
0.465593	0.820758	0.557152
0.945374	0.615948	0.676976
1.2211	0.648712	0.898498
0.955159	0.845976	0.738692
0.973606	0.662467	0.590896
1.35936	0.932494	1.33448
0.627034	0.889973	0.716265
0.886926	0.76491	0.5451
1.75388	0.915251	0.828749
