# Supplementary material for: ACK1 and BRK non-receptor tyrosine kinase deficiencies are associated with familial systemic lupus and involved in efferocytosis
Source: eLife. 2024 Nov 21;13:RP96085. doi: 10.7554/eLife.96085 (PMC11581429; doi:10.7554/eLife.96085)
Supplement: Figure 5—source data 2. [file elife-96085-fig5-data2.xlsx]

## Sheet: Sheet1
Figure 5 - Source Data 2
Figure 5C: Frustrated engulfment assay for actin remodeling quantification in response to PtdSer in AIM100 treated WT macrophages
Plot values (Actin Clearance Factor Fold Change)			Statistics: p-values were calculated using a Mann-Whitney test
WT	WT + AIM100		Comparisson	P Value
0.71894	0.603089		WT vs. WT + AIM100	<0.0001
0.498037	0.393089
1.17301	0.530078
0.627807	0.554614
0.410823	0.533536
0.841024	0.484661
1.23817	0.441767
0.969006	0.715766
0.775205	0.49762
1.78297	0.885289
1.29201	0.626395
2.07322	1.93213
0.736765	1.30563
0.48929	0.396427
2.17436	0.542629
1.56401	0.801264
1.11436	0.484082
0.557179	0.865604
2.22871	0.653486
1.22121	0.622329
1.04881	0.545585
1.6509	0.470665
0.99054	0.820587
0.841024	0.509479
0.736765	0.45633
1.07408	0.473892
0.582671	0.43602
0.527506	0.467432
0.530646	0.577088
0.928631	0.443834
0.948389	0.366701
1.62088	0.516205
0.557179	0.538402
0.788926	0.830371
0.969006	0.500807
0.627807	0.575524
0.696473	0.55334
0.810442	0.326552
0.540295	0.58153
0.602355	0.516295
0.610607	0.493816
1.29201	0.472811
0.958587	0.521672
1.41506	0.474472
1.68205	0.401209
1.81936	0.44168
0.598313	0.444432
0.969006	0.437668
0.66036	0.485083
0.680524	0.609147
1.27355	0.516893
0.969006	0.479603
1.22121	0.515012
1.04881	1.43119
1.00167	0.624727
0.575152	0.409314
0.665288	0.663802
	1.41483
	0.442842
	0.601015
