# Supplementary material for: ACK1 and BRK non-receptor tyrosine kinase deficiencies are associated with familial systemic lupus and involved in efferocytosis
Source: eLife. 2024 Nov 21;13:RP96085. doi: 10.7554/eLife.96085 (PMC11581429; doi:10.7554/eLife.96085)
Supplement: Figure 5—source data 4. [file elife-96085-fig5-data4.xlsx]

## Sheet: Sheet1
Figure 5 - Source Data 4
Figure 5E: Quantification of apoptotic cell uptake by WT and mutant iPSC-derived macrophages
Plot values (MFI pHrodo Fold Change)				Statistics: p-values were calculated using an Ordinary one-way ANOVA (Tukey’s multiple comparisons test)
Isogenic WT	BRK G321R	ACK1 A156T; K161Q		Comparisson	P Value
0.978027	0.889554	0.683739		Isogenic WT vs. BRK G321R	0.0025
0.980876	0.833547	0.700962		Isogenic WT vs. ACK1 A156T; K161Q	<0.0001
1.0411	0.802569	0.785098		BRK G321R vs. ACK1 A156T; K161Q	0.0412
1.04997	0.90607	0.684983
0.900252	0.720667	0.73657
1.04978	0.904713	0.847889
