# Supplementary material for: ACK1 and BRK non-receptor tyrosine kinase deficiencies are associated with familial systemic lupus and involved in efferocytosis
Source: eLife. 2024 Nov 21;13:RP96085. doi: 10.7554/eLife.96085 (PMC11581429; doi:10.7554/eLife.96085)
Supplement: Figure 5—source data 5. [file elife-96085-fig5-data5.xlsx]

## Sheet: Sheet1
Figure 5 - Source Data 5
Figure 5F: Quantification of apoptotic cell uptake by inhibitor treated and control WT iPSC-derived macrophages
Plot values (MFI pHrodo Fold Change)								Statistics: p-values were calculated using an Ordinary one-way ANOVA (Tukey’s multiple comparisons test)
WT no apoptotic cells	WT	WT + Cpd4f	WT + AIM100	WT + Cpd4f + AIM100	WT + R-9b	WT + R-9b + Cpd4f		Comparisson	P Value
0.00177907	1	0.834998	0.688297	0.610427				WT vs. WT + Cpd4f	<0.0001
0.00251242	1.0522	0.750377	0.622076	0.527525				WT vs. WT + AIM100	<0.0001
		0.81302	0.515382	0.549048				WT vs. WT + Cpd4f + AIM100	<0.0001
	1.06996	0.906566	0.621155	0.549132				WT vs. WT + R-9b	<0.0001
0.00872746	1.04442	0.576169	0.462765	0.506663				WT vs. WT + R-9b + Cpd4f	<0.0001
	0.955579	0.736086	0.618761	0.502221				WT Cpd4f vs. WT + AIM100	0.0059
0.00223636	1.02901	0.820513	0.843166	0.606709				WT Cpd4f vs. WT Cpd4f + AIM100	0.0028
0.002246	0.9278	0.859071	0.690476	0.70455				WT Cpd4f vs. WT + R-9b	0.1877
0.00225564	1.04318	0.862927	0.743108	0.634471				WT Cpd4f vs. WT R-9b + Cpd4f	0.0147
0.00272932	0.899144	0.845188	0.752229	0.704489	0.69404	0.585498		WT + AIM100 vs. WT + Cpd4f + AIM100	>0.9999
0.00272031	1.04354	0.933373	0.735655	0.686023	0.581895	0.585498		WT + AIM100 vs. WT + R-9b	0.9923
	1.05732							WT + AIM100 vs. Iso R9BandC	0.9979
0.00492124	1.03232	0.950679	0.732319	0.842966	0.913362	0.695492		WT Cpd4f + AIM100 vs. WT + R-9b	0.9733
	0.981803	0.894297	0.590712	0.885334	0.800272	0.705595		WT Cpd4f + AIM100 vs. WT R-9b + Cpd4f	0.9998
	0.985877	0.940576	0.689625	0.814775	0.878653	0.865942		WT Cpd4f + AIM100 vs. WT R-9b + Cpd4f	0.9525
0.0040996	1	0.63929	0.537488	0.470629	0.527858	0.366901
	1.05239	0.577	0.614525	0.707073	0.501444	0.560767
	0.947613	0.574892	0.572362	0.572784	0.523731	0.649942
