# Supplementary material for: ACK1 and BRK non-receptor tyrosine kinase deficiencies are associated with familial systemic lupus and involved in efferocytosis
Source: eLife. 2024 Nov 21;13:RP96085. doi: 10.7554/eLife.96085 (PMC11581429; doi:10.7554/eLife.96085)
Supplement: Figure 5—source data 6. [file elife-96085-fig5-data6.xlsx]

## Sheet: Sheet1
Figure 5 - Source Data 6
Figure 5G: Quantification of opsonized red blood cell uptake by inhibitor treated and control WT and mutant iPSC-derived macrophages
Plot values (left) (MFI pHrodo Fold Change)							Statistics (left plot): p-values were calculated using an Ordinary one-way ANOVA (Tukey’s multiple comparisons test)
Isogenic WT	BRK G321R	ACK1 A156T; K161Q					Comparisson	P Value
1.0159	1.03977	1.14248					Isogenic WT vs. BRK G321R	0.273
0.923726	1.09666	1.16776					Isogenic WT vs. ACK1 A156T; K161Q	0.012
1.06038	1.10179	1.22189					BRK G321R vs. ACK1 A156T; K161Q	0.1046
	1.03266	1.09191
Plot values (right) (MFI pHrodo Fold Change)							Statistics: p-values were calculated using an Ordinary one-way ANOVA (Tukey’s multiple comparisons test)
WT	WT + Cpd4f	WT + AIM100	WT + Cpd4f + AIM100	WT + R-9b	WT + R-9b + Cpd4f		Comparisson	P Value
0.97182	1.08717	1.18633	1.28825	1.07493	1.14051		WT vs. WT + Cpd4f	0.5438
1.0295	1.00895	1.21359	1.25625	1.11009	1.01765		WT vs. WT + AIM100	0.5379
0.998683	1.10495	1.18278	0.993152				WT vs. WT + Cpd4f + AIM100	0.1961
	1.15792	0.944737	1.13215				WT vs. WT + R-9b	0.8789
	1.05531	1.04688	1.15654				WT vs. WT + R-9b + Cpd4f	0.9329
	1.25929	1.10316					WT Cpd4f vs. WT + AIM100	>0.9999
							WT Cpd4f vs. WT Cpd4f + AIM100	0.9301
							WT Cpd4f vs. WT + R-9b	0.9998
							WT Cpd4f vs. WT R-9b + Cpd4f	0.9976
							WT + AIM100 vs. WT + Cpd4f + AIM100	0.9333
							WT + AIM100 vs. WT + R-9b	0.9998
							WT + AIM100 vs. Iso R9BandC	0.9974
							WT Cpd4f + AIM100 vs. WT + R-9b	0.9318
							WT Cpd4f + AIM100 vs. WT R-9b + Cpd4f	0.8716
							WT Cpd4f + AIM100 vs. WT R-9b + Cpd4f	>0.9999
