# Supplementary figures and images for: ACK1 and BRK non-receptor tyrosine kinase deficiencies are associated with familial systemic lupus and involved in efferocytosis
Source: eLife journal article supplement (doi:10.7554/elife.96085), 2024-03-23

Full unedited gels for Figure 4A. The red box shows the image used in the manuscript.

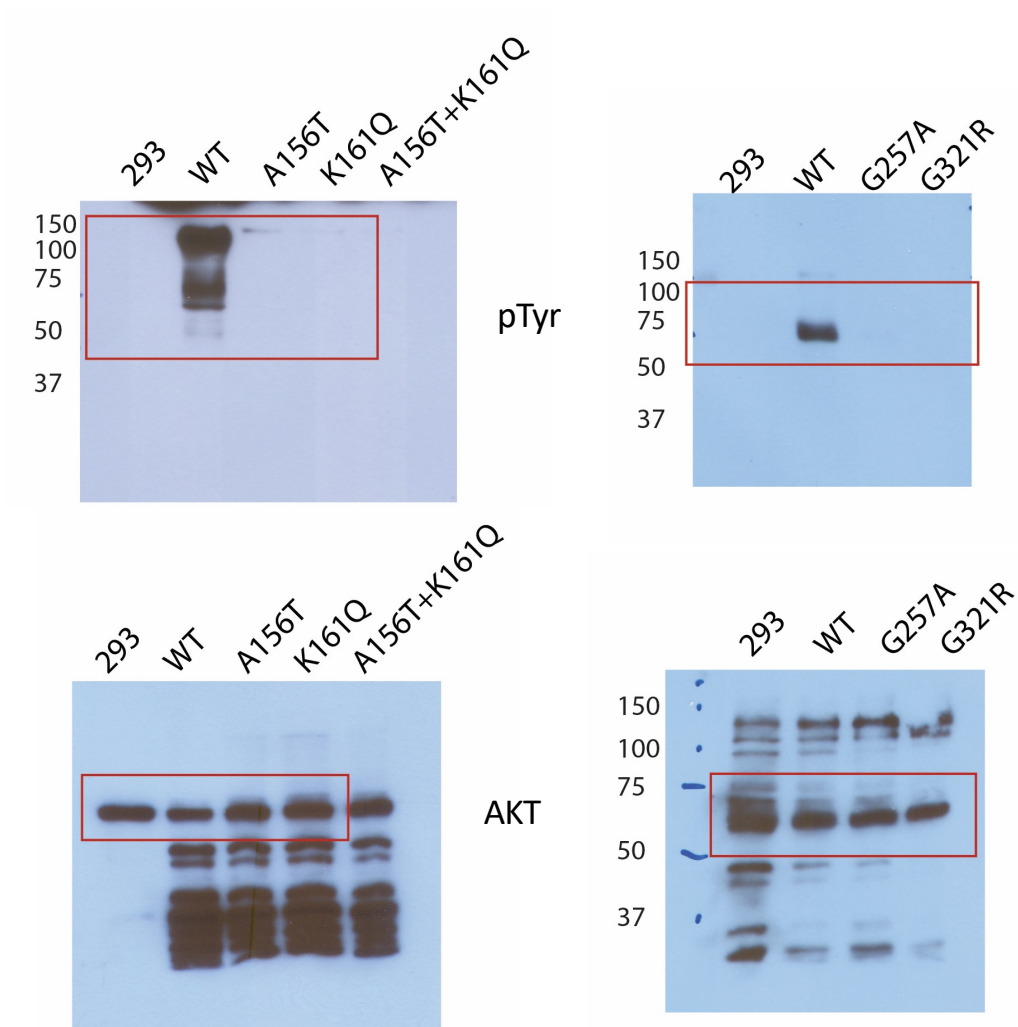

Supplement: fig4-data6 [file elife-96085-fig4-data6-v1.zip]
